# Supplementary material for: Genome-wide A-to-I RNA editing in fungi independent of ADAR enzymes
Source: HighWire-hosted journal article supplement (doi:10.1101/gr.199877.115), 2016-03-02
Supplement: A-to-I_RNA_editing_sites_identified_in_Fusarium_graminearum.xlsx [file A-to-I_RNA_editing_sites_identified_in_Fusarium_graminearum.xlsx]

## Sheet: Sheet1
A-to-I RNA editing sites identified in Fusarium graminearum (editing level ≥3%)
Chromosome	Site	Coverage	Editing level (%)
1	254978	83	10.8434
1	263033	2703	13.8365
1	263075	2212	30.9222
1	343475	136	7.35294
1	343754	120	6.66667
1	372135	119	5.04202
1	372177	462	3.0303
1	381707	63	7.93651
1	460950	71	9.85915
1	462225	363	3.30579
1	503904	274	81.3869
1	505492	38	26.3158
1	512093	33	33.3333
1	515976	149	4.69799
1	516148	59	40.678
1	525168	27	22.2222
1	543466	180	7.22222
1	543960	159	8.80503
1	544005	160	8.75
1	552073	117	5.12821
1	555135	641	9.04836
1	555332	659	22.4583
1	560339	106	5.66038
1	561446	95	37.8947
1	563057	72	31.9444
1	568261	112	21.4286
1	578167	36	16.6667
1	578372	66	12.1212
1	578483	63	23.8095
1	580351	321	82.866
1	580500	161	3.72671
1	582068	119	5.04202
1	582748	86	10.4651
1	582836	102	9.80392
1	583008	120	20
1	583272	95	14.7368
1	583399	87	19.5402
1	586702	291	16.4948
1	587431	268	4.10448
1	587639	237	47.6793
1	593907	153	8.49673
1	593919	160	13.125
1	594315	217	11.5207
1	595971	87	11.4943
1	596158	117	5.12821
1	597174	108	19.4444
1	597270	113	5.30973
1	597316	111	4.5045
1	600810	1360	17.9412
1	600873	1326	64.7059
1	601221	1551	3.35268
1	601270	1485	3.23232
1	601438	446	7.62332
1	611730	102	54.902
1	611747	94	27.6596
1	611750	92	7.6087
1	612835	76	7.89474
1	613148	133	21.0526
1	614197	126	3.96825
1	614247	131	6.87023
1	614311	146	23.9726
1	614544	133	14.2857
1	614877	235	3.40426
1	615278	149	3.3557
1	615649	197	7.1066
1	616009	153	7.84314
1	616536	175	25.1429
1	616602	153	12.4183
1	617058	172	5.23256
1	617205	172	13.9535
1	617279	192	8.33333
1	617349	198	5.55556
1	617646	192	10.9375
1	617757	206	5.82524
1	617832	180	9.44444
1	618318	152	8.55263
1	618606	151	12.5828
1	619833	118	4.23729
1	619930	140	13.5714
1	620314	122	13.1148
1	620350	115	12.1739
1	620610	97	13.4021
1	620938	114	10.5263
1	620941	114	10.5263
1	621025	103	7.76699
1	621896	97	11.3402
1	621946	98	14.2857
1	622024	99	6.06061
1	622379	110	4.54545
1	627340	2089	5.88798
1	627617	1464	7.58197
1	627623	1479	3.78634
1	627632	1479	16.7005
1	627971	2060	16.5049
1	628160	2345	3.19829
1	628607	2087	3.21035
1	629386	18	72.2222
1	629850	112	5.35714
1	630707	156	37.8205
1	630723	159	3.77358
1	630772	168	18.4524
1	630792	176	18.75
1	630811	166	9.03614
1	630925	150	11.3333
1	630991	146	45.8904
1	630997	148	70.2703
1	631182	169	5.91716
1	631650	152	21.0526
1	631686	164	6.09756
1	631843	157	63.6943
1	631910	162	51.2346
1	631927	156	37.1795
1	632064	112	80.3571
1	632725	127	3.93701
1	633117	60	23.3333
1	673633	566	36.7491
1	676082	10	50
1	690666	40	15
1	690691	57	43.8596
1	690722	92	5.43478
1	691671	152	3.94737
1	691842	18	50
1	693978	48	35.4167
1	710421	180	3.33333
1	713356	37	13.5135
1	745582	18	61.1111
1	745657	28	64.2857
1	745905	35	20
1	745908	36	19.4444
1	746272	41	36.5854
1	746275	42	21.4286
1	768971	596	5.7047
1	769482	829	7.84077
1	770273	1247	18.4443
1	770345	134	3.73134
1	770608	994	14.0845
1	770952	1320	6.9697
1	771114	1188	14.6465
1	771599	1569	3.12301
1	773009	207	14.0097
1	773220	224	6.69643
1	773328	187	7.48663
1	775593	165	13.3333
1	775603	162	37.037
1	775671	168	86.3095
1	775888	135	80
1	776452	129	12.4031
1	777035	159	12.5786
1	777109	163	21.4724
1	777222	188	47.8723
1	777290	227	3.0837
1	786004	59	10.1695
1	786761	119	5.04202
1	786962	165	13.9394
1	787147	134	11.194
1	787154	135	5.92593
1	787324	176	9.09091
1	787654	239	12.5523
1	788406	321	13.7072
1	788608	331	14.1994
1	788673	330	8.78788
1	788823	312	12.1795
1	788964	358	12.2905
1	789135	377	5.57029
1	789144	380	6.05263
1	789987	378	3.1746
1	790168	430	6.74419
1	790207	371	5.66038
1	790353	420	10.2381
1	790678	515	9.12621
1	791940	87	11.4943
1	792066	139	7.91367
1	803454	27	18.5185
1	804599	27	77.7778
1	804641	26	69.2308
1	810667	94	29.7872
1	810787	314	23.5669
1	810852	364	6.86813
1	810985	465	75.0538
1	811041	465	70.1075
1	811175	441	92.7438
1	811373	447	27.2931
1	811663	466	91.8455
1	811773	483	86.9565
1	812032	348	39.0805
1	813317	202	3.46535
1	817344	126	3.96825
1	817860	170	6.47059
1	820767	377	20.9549
1	822813	270	9.62963
1	823368	177	3.38983
1	824695	10	60
1	825701	184	3.80435
1	825750	198	5.55556
1	826165	223	9.86547
1	826175	209	15.311
1	826580	226	7.9646
1	826734	241	24.0664
1	826829	244	24.1803
1	827711	214	5.14019
1	827761	232	6.03448
1	827914	248	22.9839
1	828039	251	13.5458
1	844598	196	6.63265
1	844928	288	14.9306
1	845365	264	3.78788
1	845459	261	6.13027
1	845791	194	3.09278
1	847075	230	6.52174
1	847273	243	30.0412
1	847425	321	5.29595
1	847552	318	10.0629
1	847895	343	12.2449
1	848960	360	5
1	865580	100	9
1	876211	319	12.5392
1	877782	208	25.4808
1	877885	197	6.59898
1	877930	189	3.1746
1	878296	208	23.0769
1	878454	182	19.7802
1	878563	203	28.5714
1	878602	218	4.58716
1	878785	243	7.81893
1	879520	110	11.8182
1	883500	18	50
1	885797	165	7.27273
1	885938	179	3.35196
1	887057	237	54.0084
1	888217	192	3.125
1	888285	224	7.14286
1	888558	194	5.15464
1	888572	183	6.55738
1	888788	225	17.3333
1	889533	191	3.14136
1	889572	178	37.0787
1	889692	237	19.8312
1	892153	70	12.8571
1	892996	51	13.7255
1	902857	1089	42.9752
1	902911	1060	17.3585
1	902980	988	8.80567
1	903037	1033	5.4211
1	903076	1005	10.7463
1	903138	1140	51.3158
1	903208	1168	45.8904
1	903226	1376	34.0116
1	903498	1106	26.7631
1	903652	325	3.07692
1	908495	20	25
1	910203	75	8
1	910690	75	13.3333
1	911181	37	29.7297
1	911485	38	44.7368
1	912180	31	22.5806
1	913934	204	6.86275
1	914283	212	5.66038
1	914313	219	5.47945
1	914316	227	4.40529
1	915255	338	6.50888
1	915429	336	5.95238
1	915561	364	7.96703
1	915726	352	13.3523
1	915837	290	9.65517
1	915852	290	5.51724
1	915969	299	31.4381
1	916515	367	11.9891
1	916728	317	17.0347
1	916827	284	9.50704
1	916908	315	33.3333
1	916947	356	6.74157
1	917892	371	16.9811
1	918657	428	7.71028
1	918980	450	13.5556
1	919089	444	6.53153
1	919128	397	15.6171
1	919281	457	15.3173
1	919548	426	3.05164
1	920394	487	3.90144
1	921248	423	5.91017
1	922148	92	19.5652
1	922442	71	19.7183
1	925035	124	6.45161
1	925098	126	8.73016
1	926880	137	16.0584
1	926929	198	64.6465
1	926958	204	5.88235
1	927389	272	81.6176
1	927401	283	84.0989
1	927524	288	45.4861
1	927548	284	73.5915
1	927641	265	21.1321
1	927686	277	84.4765
1	927839	266	75.5639
1	928067	193	77.2021
1	928093	190	7.89474
1	928229	240	40
1	928258	244	9.42623
1	928316	225	19.5556
1	928471	234	41.0256
1	928651	226	80.9735
1	928724	238	18.9076
1	928727	240	49.5833
1	928878	256	10.9375
1	929054	231	3.4632
1	929062	232	23.2759
1	929085	230	5.65217
1	929113	238	33.6134
1	929215	165	90.9091
1	929440	208	42.7885
1	929557	200	91
1	929782	135	24.4444
1	929853	130	56.1538
1	929869	129	36.4341
1	932469	361	16.6205
1	932856	402	17.9104
1	932982	398	25.1256
1	933282	281	31.3167
1	937752	97	17.5258
1	937914	112	22.3214
1	937982	128	32.0312
1	939250	25	52
1	941129	158	6.32911
1	941150	179	5.58659
1	942070	314	8.59873
1	942102	300	14.3333
1	942314	336	17.2619
1	946144	444	21.3964
1	946449	1068	6.83521
1	946642	1142	45.2715
1	946958	950	72.1053
1	947637	952	73.0042
1	947925	1007	9.63257
1	948104	1086	4.78821
1	948108	1074	65.7356
1	948312	1054	74.8577
1	949468	154	7.14286
1	949547	160	5.625
1	949659	192	9.89583
1	949753	177	20.904
1	950987	299	68.5619
1	951025	327	35.7798
1	951070	424	3.06604
1	951114	502	53.9841
1	951135	553	11.9349
1	951166	514	86.965
1	951894	623	65.3291
1	952409	265	4.15094
1	953793	158	13.9241
1	953862	151	4.63576
1	954006	133	56.391
1	956921	376	21.8085
1	956931	387	14.7287
1	957046	351	35.3276
1	957087	288	47.2222
1	957344	244	46.7213
1	957636	375	24.8
1	957873	310	31.2903
1	957888	264	41.6667
1	958059	212	21.2264
1	958151	217	4.14747
1	960600	306	17.6471
1	960706	274	25.1825
1	961227	239	31.3808
1	961408	261	15.3257
1	961471	294	18.3673
1	961569	278	41.0072
1	961686	279	42.2939
1	964186	20	30
1	964330	39	30.7692
1	964603	44	29.5455
1	964784	28	28.5714
1	964966	30	46.6667
1	965584	33	24.2424
1	965835	37	13.5135
1	966050	56	39.2857
1	966541	56	21.4286
1	966587	55	21.8182
1	966640	56	25
1	966731	49	10.2041
1	968776	238	5.46218
1	969552	75	6.66667
1	969972	76	31.5789
1	970299	64	26.5625
1	970993	75	9.33333
1	972424	1619	10.9327
1	973462	21	57.1429
1	973645	22	31.8182
1	973876	36	27.7778
1	978007	73	6.84932
1	983609	117	54.7009
1	985803	30	30
1	986986	22	50
1	987242	22	27.2727
1	990273	163	4.90798
1	991812	287	7.31707
1	995247	312	8.33333
1	995306	349	8.30946
1	995374	377	14.5889
1	1003477	27	22.2222
1	1003913	22	22.7273
1	1007870	63	7.93651
1	1010506	17	47.0588
1	1010970	94	5.31915
1	1011094	76	15.7895
1	1012017	61	8.19672
1	1013874	212	86.3208
1	1014051	161	90.6832
1	1014284	37	51.3514
1	1014545	148	10.8108
1	1014563	148	40.5405
1	1015032	203	49.7537
1	1015199	178	14.0449
1	1015272	178	66.2921
1	1015293	180	11.1111
1	1015395	149	40.2685
1	1015431	130	19.2308
1	1015810	41	17.0732
1	1016253	37	21.6216
1	1016319	48	52.0833
1	1018002	154	14.9351
1	1018076	139	9.35252
1	1018495	128	14.0625
1	1018677	190	6.84211
1	1018935	166	4.81928
1	1019037	151	11.2583
1	1019157	131	6.10687
1	1019160	133	12.782
1	1020061	134	5.22388
1	1020873	164	23.1707
1	1021038	198	6.56566
1	1021242	193	21.2435
1	1021263	183	8.74317
1	1021542	134	23.8806
1	1021578	153	16.3399
1	1022208	120	25.8333
1	1023405	93	20.4301
1	1023617	117	11.9658
1	1023736	109	23.8532
1	1023738	104	22.1154
1	1030232	131	38.9313
1	1030791	196	50.5102
1	1030871	201	51.7413
1	1031597	262	3.05344
1	1031795	156	3.84615
1	1031827	149	3.3557
1	1031936	210	58.5714
1	1032256	183	52.459
1	1032995	190	43.1579
1	1033265	195	33.8462
1	1033592	193	13.4715
1	1034026	235	12.3404
1	1035643	138	28.2609
1	1035818	170	40.5882
1	1036076	142	20.4225
1	1045451	887	4.96054
1	1046564	761	6.17608
1	1046939	594	4.7138
1	1047309	79	10.1266
1	1047506	132	38.6364
1	1047547	140	40
1	1047565	133	9.02256
1	1050900	453	3.31126
1	1051203	457	8.09628
1	1051365	377	11.9363
1	1051954	369	4.33604
1	1052422	360	4.16667
1	1053191	27	18.5185
1	1053584	15	53.3333
1	1053728	19	42.1053
1	1057848	216	4.62963
1	1058002	227	3.0837
1	1060059	44	18.1818
1	1060964	44	27.2727
1	1061971	81	14.8148
1	1062304	94	15.9574
1	1062319	96	10.4167
1	1062387	133	4.51128
1	1062399	130	23.0769
1	1062705	155	23.2258
1	1062727	143	3.4965
1	1062929	127	4.72441
1	1063095	96	28.125
1	1063829	81	8.64198
1	1064708	85	9.41176
1	1065162	53	18.8679
1	1067662	94	12.766
1	1067972	160	9.375
1	1068209	177	55.3672
1	1068282	198	28.7879
1	1068587	224	16.0714
1	1068593	222	19.8198
1	1068827	225	16.4444
1	1068933	219	20.5479
1	1069034	244	11.8852
1	1069207	221	3.61991
1	1070219	1208	3.22848
1	1070223	1246	9.55056
1	1070448	1530	3.52941
1	1075670	180	7.77778
1	1078931	75	13.3333
1	1079085	62	12.9032
1	1079099	61	37.7049
1	1079848	16	31.25
1	1081080	62	9.67742
1	1082755	36	41.6667
1	1083808	45	26.6667
1	1083950	57	17.5439
1	1087801	398	6.03015
1	1089256	415	15.4217
1	1089773	284	22.5352
1	1089927	323	4.64396
1	1104566	326	3.68098
1	1108868	23	21.7391
1	1112294	14	50
1	1115331	361	7.20222
1	1115870	240	10.8333
1	1116401	282	23.4043
1	1116505	284	9.50704
1	1116589	286	15.3846
1	1116714	280	4.64286
1	1119561	191	3.14136
1	1119594	272	91.1765
1	1119858	582	28.6942
1	1119893	627	94.7368
1	1120010	548	95.2555
1	1120415	472	97.6695
1	1120976	662	75.9819
1	1121287	522	96.1686
1	1122073	690	98.1159
1	1122274	689	3.62845
1	1122547	416	30.5288
1	1124187	146	4.10959
1	1124287	178	10.1124
1	1124343	191	10.9948
1	1124415	172	12.2093
1	1124452	172	33.7209
1	1125310	153	21.5686
1	1126655	148	8.10811
1	1127173	171	5.26316
1	1129335	935	54.4385
1	1129338	936	39.6368
1	1129656	969	40.3509
1	1129697	901	44.7281
1	1129891	885	55.8192
1	1134727	658	5.92705
1	1134863	843	33.0961
1	1135348	609	31.8555
1	1135443	605	3.96694
1	1135496	614	38.1107
1	1135568	570	29.4737
1	1135844	475	33.0526
1	1135847	475	35.3684
1	1135976	564	30.1418
1	1138626	73	6.84932
1	1146153	102	26.4706
1	1146222	103	8.73786
1	1153130	185	4.86486
1	1153503	221	17.1946
1	1153710	242	30.1653
1	1153999	243	6.17284
1	1154883	318	5.34591
1	1156579	274	6.56934
1	1156794	363	4.40771
1	1156814	382	13.3508
1	1157104	315	10.7937
1	1157257	280	3.57143
1	1157315	199	4.52261
1	1157336	175	12.5714
1	1158054	60	71.6667
1	1158165	35	60
1	1158222	38	65.7895
1	1158252	37	72.973
1	1158414	54	55.5556
1	1158450	54	16.6667
1	1158604	51	35.2941
1	1158606	50	48
1	1158660	47	10.6383
1	1158900	47	23.4043
1	1159137	63	58.7302
1	1159209	62	69.3548
1	1159425	57	22.807
1	1159917	68	52.9412
1	1160037	90	15.5556
1	1160409	50	40
1	1160468	40	50
1	1161486	52	26.9231
1	1162394	317	25.8675
1	1162625	552	23.0072
1	1164355	212	16.5094
1	1164525	224	19.1964
1	1164762	225	32
1	1164999	214	4.6729
1	1165144	190	10
1	1165368	228	16.6667
1	1165459	189	3.1746
1	1165592	232	9.48276
1	1165819	212	16.5094
1	1165974	183	12.0219
1	1165978	178	25.8427
1	1166137	192	8.33333
1	1166238	206	30.5825
1	1167724	303	5.28053
1	1167829	265	18.1132
1	1169404	87	8.04598
1	1170271	63	12.6984
1	1170553	54	25.9259
1	1171974	38	21.0526
1	1173116	36	19.4444
1	1173191	37	18.9189
1	1173854	25	44
1	1174385	22	31.8182
1	1177359	72	47.2222
1	1177504	55	43.6364
1	1177903	87	39.0805
1	1177985	90	17.7778
1	1178396	87	51.7241
1	1179236	21	47.619
1	1179625	163	11.6564
1	1179662	165	25.4545
1	1180167	158	57.5949
1	1180252	166	52.4096
1	1181592	166	3.01205
1	1184270	188	3.19149
1	1184303	200	26.5
1	1184366	197	27.9188
1	1184432	191	25.6545
1	1184648	168	32.1429
1	1184951	156	22.4359
1	1184961	146	17.1233
1	1185206	158	6.32911
1	1185308	103	29.1262
1	1185359	110	26.3636
1	1185699	73	13.6986
1	1186151	88	29.5455
1	1186316	98	20.4082
1	1186533	79	7.59494
1	1186616	108	8.33333
1	1186782	149	4.69799
1	1187604	121	7.43802
1	1187700	152	38.1579
1	1188356	26	19.2308
1	1189763	329	6.99088
1	1189781	338	26.9231
1	1189931	316	8.86076
1	1189934	311	30.5466
1	1190054	317	53.9432
1	1190127	260	3.84615
1	1190730	149	5.36913
1	1190968	141	45.3901
1	1191096	128	60.1562
1	1191179	135	18.5185
1	1191279	128	57.0312
1	1191430	116	9.48276
1	1191552	93	48.3871
1	1191633	102	5.88235
1	1191837	103	54.3689
1	1192257	77	37.6623
1	1192584	59	72.8814
1	1192636	60	15
1	1200773	80	32.5
1	1202620	327	9.78593
1	1202692	343	3.49854
1	1203256	388	3.09278
1	1203316	386	9.06736
1	1203638	418	6.9378
1	1203660	396	15.1515
1	1203787	403	3.47395
1	1204054	324	4.32099
1	1208547	371	20.2156
1	1210089	564	30.6738
1	1210545	631	13.4707
1	1210934	532	15.9774
1	1210946	516	10.0775
1	1211378	374	3.47594
1	1211553	471	15.7113
1	1211743	476	9.03361
1	1212074	302	4.30464
1	1213122	124	8.06452
1	1217836	87	26.4368
1	1217918	172	66.2791
1	1218003	191	23.5602
1	1218523	237	5.06329
1	1218861	271	26.5683
1	1219468	150	4
1	1219824	83	6.0241
1	1220685	29	17.2414
1	1220688	29	31.0345
1	1220791	33	27.2727
1	1227973	171	15.7895
1	1227986	172	3.48837
1	1228205	194	6.70103
1	1228304	187	21.3904
1	1228532	172	11.6279
1	1228986	213	4.22535
1	1228987	213	4.22535
1	1229225	174	14.9425
1	1229309	175	4
1	1229474	163	31.9018
1	1229576	166	11.4458
1	1229703	185	22.7027
1	1232697	299	10.0334
1	1233425	497	8.04829
1	1233495	615	8.94309
1	1233587	657	5.78387
1	1233829	605	8.76033
1	1233878	608	9.53947
1	1233927	556	11.6906
1	1233983	547	10.6033
1	1233991	536	4.85075
1	1234013	514	20.0389
1	1234167	569	7.38137
1	1234436	632	9.49367
1	1234451	641	14.3526
1	1234573	588	11.3946
1	1234809	564	9.21986
1	1234840	494	5.06073
1	1235064	563	6.92718
1	1235105	576	25.6944
1	1235265	501	14.1717
1	1235496	620	20.9677
1	1235549	559	9.30233
1	1235691	489	3.88548
1	1235902	518	4.2471
1	1235957	499	26.8537
1	1236416	518	16.6023
1	1236423	516	10.8527
1	1236442	484	5.16529
1	1236693	437	17.1625
1	1243697	5112	14.9648
1	1248299	228	9.64912
1	1248307	234	14.1026
1	1248686	358	16.4804
1	1248704	361	65.928
1	1248832	392	16.3265
1	1248896	361	64.8199
1	1249615	281	14.9466
1	1251024	228	3.07018
1	1258428	42	19.0476
1	1259652	428	17.2897
1	1259835	513	22.6121
1	1259862	527	51.9924
1	1260390	447	5.59284
1	1264745	56	10.7143
1	1267345	152	5.26316
1	1268324	564	65.4255
1	1268431	654	47.2477
1	1268936	178	5.61798
1	1270916	90	5.55556
1	1270931	91	5.49451
1	1271384	69	13.0435
1	1272137	167	4.19162
1	1272630	183	9.83607
1	1275705	239	4.1841
1	1276416	346	3.17919
1	1276696	75	6.66667
1	1279914	96	5.20833
1	1279989	114	11.4035
1	1280161	159	14.4654
1	1280400	129	11.6279
1	1280601	141	11.3475
1	1282311	137	8.0292
1	1282315	135	7.40741
1	1282367	175	5.71429
1	1283762	67	28.3582
1	1284002	75	8
1	1284035	75	36
1	1284043	81	18.5185
1	1284406	90	27.7778
1	1284670	94	14.8936
1	1284798	96	9.375
1	1284842	119	26.8908
1	1284926	125	27.2
1	1285123	116	4.31034
1	1285136	124	10.4839
1	1285237	121	4.95868
1	1285373	115	14.7826
1	1285486	116	13.7931
1	1285731	73	9.58904
1	1288007	70	11.4286
1	1290714	126	56.3492
1	1290728	131	13.7405
1	1290959	93	52.6882
1	1291073	93	19.3548
1	1291175	106	16.0377
1	1291340	131	70.9924
1	1291852	94	12.766
1	1292392	127	3.93701
1	1292561	111	64.8649
1	1292830	128	15.625
1	1292885	123	75.6098
1	1305028	15	33.3333
1	1311766	16	50
1	1312691	28	53.5714
1	1312701	27	18.5185
1	1313026	38	31.5789
1	1315653	115	5.21739
1	1315848	234	35.8974
1	1315995	228	11.8421
1	1315998	223	7.62332
1	1316193	187	17.6471
1	1316576	199	22.6131
1	1316745	182	15.3846
1	1316897	164	4.26829
1	1316961	204	4.41176
1	1317087	255	13.7255
1	1317111	254	12.9921
1	1317234	210	12.8571
1	1317243	207	24.6377
1	1317861	222	13.0631
1	1317868	228	28.9474
1	1318002	202	22.2772
1	1318156	244	25
1	1318484	271	5.90406
1	1318818	387	15.2455
1	1319495	275	23.2727
1	1319539	308	3.57143
1	1324399	15	46.6667
1	1325598	126	10.3175
1	1325915	96	6.25
1	1328389	72	6.94444
1	1329421	121	9.09091
1	1330071	146	6.16438
1	1330724	63	7.93651
1	1333697	29	17.2414
1	1333795	55	58.1818
1	1333969	107	24.2991
1	1333997	101	36.6337
1	1334102	103	9.70874
1	1334213	92	55.4348
1	1334540	87	36.7816
1	1334597	102	50.9804
1	1334972	71	56.338
1	1338593	25	36
1	1339100	38	15.7895
1	1339695	11	45.4545
1	1345080	19	26.3158
1	1354992	142	44.3662
1	1355535	75	9.33333
1	1355957	194	23.1959
1	1356219	34	35.2941
1	1356845	79	13.9241
1	1356897	81	6.17284
1	1357432	54	14.8148
1	1371745	866	3.4642
1	1372673	849	5.06478
1	1373543	33	18.1818
1	1378988	105	31.4286
1	1378993	124	16.129
1	1379094	242	17.7686
1	1379202	275	33.8182
1	1379496	197	17.2589
1	1379706	228	30.2632
1	1380150	220	32.7273
1	1380527	210	34.7619
1	1380702	205	22.439
1	1380879	202	16.8317
1	1381010	207	35.7488
1	1384677	303	42.9043
1	1384958	285	14.0351
1	1385765	280	8.21429
1	1386223	141	9.21986
1	1386241	133	3.7594
1	1388145	63	22.2222
1	1388253	66	21.2121
1	1388288	62	64.5161
1	1388466	86	22.093
1	1389253	86	62.7907
1	1389357	108	29.6296
1	1389447	123	56.0976
1	1390141	78	60.2564
1	1390299	92	27.1739
1	1390500	112	26.7857
1	1390754	104	44.2308
1	1390866	102	7.84314
1	1391475	215	10.2326
1	1391580	341	52.1994
1	1391718	359	13.649
1	1391993	345	26.3768
1	1392016	346	26.5896
1	1392023	338	10.355
1	1392196	270	5.92593
1	1392932	340	20.8824
1	1393055	316	50.9494
1	1393280	310	31.2903
1	1393325	320	56.25
1	1393571	349	71.9198
1	1393679	291	61.8557
1	1393770	272	4.04412
1	1393956	325	66.1538
1	1394025	388	35.8247
1	1394237	283	20.4947
1	1394391	281	59.4306
1	1394529	276	11.5942
1	1394686	212	37.7358
1	1394874	259	35.9073
1	1394962	210	3.80952
1	1394967	208	30.2885
1	1394976	209	19.6172
1	1397756	668	16.6168
1	1406353	42	14.2857
1	1410175	36	16.6667
1	1410453	114	4.38596
1	1411109	157	7.64331
1	1416840	1373	18.5725
1	1418395	115	6.95652
1	1420367	48	22.9167
1	1421277	36	72.2222
1	1421792	52	26.9231
1	1432815	34	17.6471
1	1436317	223	4.4843
1	1436392	279	5.01792
1	1438374	110	6.36364
1	1439674	17	76.4706
1	1439932	469	39.6588
1	1441247	245	4.89796
1	1441363	219	3.19635
1	1441862	268	8.58209
1	1452381	12	66.6667
1	1452801	351	74.359
1	1453601	14	50
1	1453628	420	5.71429
1	1453760	11	63.6364
1	1457589	60	11.6667
1	1458266	168	12.5
1	1458489	689	9.28882
1	1458768	699	3.00429
1	1459451	638	14.4201
1	1463214	84	7.14286
1	1464587	75	8
1	1464742	186	10.2151
1	1466141	303	14.5215
1	1467290	65	16.9231
1	1467524	118	35.5932
1	1468041	128	30.4688
1	1468088	134	35.8209
1	1469103	101	33.6634
1	1471722	113	4.42478
1	1472672	136	3.67647
1	1473022	160	36.875
1	1473807	80	13.75
1	1473907	90	16.6667
1	1475239	80	37.5
1	1475343	102	38.2353
1	1475525	140	24.2857
1	1475645	112	40.1786
1	1475920	106	37.7358
1	1476838	36	22.2222
1	1480110	214	28.972
1	1480242	223	10.3139
1	1481087	122	16.3934
1	1485423	180	5
1	1488141	276	3.26087
1	1488192	244	39.3443
1	1488943	193	5.18135
1	1490166	133	15.7895
1	1493356	901	3.44062
1	1493742	835	11.018
1	1493951	845	4.02367
1	1494322	821	13.6419
1	1497521	131	6.87023
1	1498022	73	6.84932
1	1499209	2229	15.0292
1	1499369	1515	7.32673
1	1501195	1529	3.72793
1	1502077	1066	3.84615
1	1505035	668	3.29341
1	1508800	205	19.0244
1	1510245	131	12.2137
1	1511473	206	6.79612
1	1514150	149	6.04027
1	1514267	324	21.2963
1	1514403	367	22.8883
1	1514445	384	25.2604
1	1514826	400	20.75
1	1514945	339	6.19469
1	1514977	325	8.61538
1	1514984	322	9.93789
1	1515108	260	5.76923
1	1515382	451	24.1685
1	1520564	41	29.2683
1	1521239	38	28.9474
1	1521869	34	26.4706
1	1523985	40	20
1	1524053	47	23.4043
1	1524760	67	19.403
1	1534840	195	3.58974
1	1537798	152	11.8421
1	1539850	27	62.963
1	1543554	37	13.5135
1	1545490	442	8.59729
1	1545616	437	4.57666
1	1546486	729	4.11523
1	1546550	701	14.408
1	1546681	752	3.59043
1	1548541	173	5.20231
1	1551511	462	3.4632
1	1551637	585	30.2564
1	1551935	650	4.30769
1	1552013	665	35.6391
1	1552969	528	4.73485
1	1553346	680	11.7647
1	1554820	119	6.72269
1	1559151	207	5.7971
1	1559214	316	3.79747
1	1560023	259	3.861
1	1560612	184	4.8913
1	1561161	262	12.9771
1	1562544	118	7.62712
1	1562590	141	12.766
1	1562811	33	15.1515
1	1563427	952	5.14706
1	1566752	609	18.555
1	1566941	617	10.859
1	1569704	146	28.7671
1	1569818	163	17.7914
1	1570515	214	8.8785
1	1572180	159	16.9811
1	1573623	219	8.6758
1	1573809	292	71.9178
1	1574138	397	15.869
1	1574245	404	3.71287
1	1574461	340	65.5882
1	1574568	235	14.8936
1	1574611	145	26.8966
1	1577746	560	60.1786
1	1577755	545	13.0275
1	1577875	553	47.7396
1	1577938	621	30.1127
1	1578079	510	61.7647
1	1578795	620	39.5161
1	1579211	574	10.9756
1	1579328	506	34.7826
1	1579337	480	25.4167
1	1579943	515	43.4951
1	1580036	545	50.2752
1	1583079	61	21.3115
1	1586736	539	13.9147
1	1588150	27	18.5185
1	1589712	151	31.1258
1	1590180	133	18.0451
1	1590630	218	11.9266
1	1591104	156	10.8974
1	1591167	164	13.4146
1	1591464	156	7.69231
1	1592617	240	5.83333
1	1592909	242	4.54545
1	1593006	252	8.33333
1	1593117	235	3.82979
1	1594165	202	11.8812
1	1594408	160	11.25
1	1595011	178	8.42697
1	1597430	119	22.6891
1	1597436	123	38.2114
1	1597487	125	48.8
1	1597565	146	6.16438
1	1597805	210	39.5238
1	1597886	217	4.60829
1	1598021	271	38.7454
1	1598309	235	35.7447
1	1598689	363	5.78512
1	1599156	244	15.1639
1	1599299	31	16.129
1	1599504	64	21.875
1	1600084	212	10.3774
1	1600794	182	6.04396
1	1600887	149	12.7517
1	1600908	153	20.915
1	1602048	203	31.0345
1	1602129	184	11.413
1	1602258	139	11.5108
1	1602393	146	17.8082
1	1602541	160	4.375
1	1604352	51	15.6863
1	1604598	115	10.4348
1	1604689	92	6.52174
1	1605172	77	6.49351
1	1607731	388	3.09278
1	1607903	343	11.9534
1	1607922	329	6.38298
1	1608037	344	3.48837
1	1608399	344	10.1744
1	1608743	310	6.77419
1	1608775	297	3.0303
1	1610531	149	3.3557
1	1612430	216	14.3519
1	1625582	326	27.9141
1	1625589	315	40.3175
1	1626032	261	4.98084
1	1626336	325	3.69231
1	1626414	283	34.9823
1	1626620	218	3.66972
1	1627234	193	43.0052
1	1627307	241	17.8423
1	1627367	255	9.80392
1	1627404	253	61.6601
1	1627672	202	41.0891
1	1627800	229	49.345
1	1627860	243	4.93827
1	1628037	222	36.9369
1	1628116	217	49.3088
1	1628283	202	3.46535
1	1628293	200	60.5
1	1628476	230	55.6522
1	1628583	227	40.0881
1	1628815	263	49.0494
1	1628986	215	16.2791
1	1629045	229	3.49345
1	1629101	217	48.3871
1	1629197	163	7.36196
1	1629697	121	35.5372
1	1629997	125	80.8
1	1630134	116	75
1	1631120	125	6.4
1	1633982	256	35.9375
1	1634444	340	27.6471
1	1634456	344	27.6163
1	1640081	1447	5.18314
1	1640175	1477	4.60393
1	1640331	1256	33.2006
1	1640456	1173	5.9676
1	1640802	1038	21.1946
1	1640922	1041	10.5668
1	1641012	949	30.4531
1	1644745	206	3.8835
1	1644942	217	8.75576
1	1645634	77	46.7532
1	1659503	153	41.8301
1	1660421	194	8.76289
1	1660517	187	5.34759
1	1660578	192	55.2083
1	1660710	200	41
1	1661339	161	8.69565
1	1661573	152	6.57895
1	1661855	237	18.9873
1	1661961	190	25.2632
1	1669387	177	9.03955
1	1673450	2248	76.8683
1	1674544	1484	47.3046
1	1674662	1365	6.08059
1	1686158	192	3.64583
1	1686353	172	7.55814
1	1687982	336	7.7381
1	1688488	564	3.7234
1	1688957	474	53.5865
1	1689092	520	35.1923
1	1689413	328	14.3293
1	1690318	14	42.8571
1	1692755	140	3.57143
1	1692763	149	13.4228
1	1693063	630	7.77778
1	1693657	726	9.77961
1	1696416	59	22.0339
1	1697182	224	11.1607
1	1697363	76	14.4737
1	1699527	439	5.46697
1	1709319	20	30
1	1713676	111	7.20721
1	1713776	104	37.5
1	1713879	86	5.81395
1	1713975	91	65.9341
1	1714024	110	25.4545
1	1714183	99	8.08081
1	1714330	93	5.37634
1	1714501	84	67.8571
1	1714652	110	12.7273
1	1714753	99	5.05051
1	1715769	59	61.0169
1	1719952	149	4.02685
1	1720000	119	23.5294
1	1720662	143	4.1958
1	1725745	94	15.9574
1	1727161	97	13.4021
1	1733663	240	23.75
1	1733910	88	11.3636
1	1734385	105	59.0476
1	1734652	144	62.5
1	1735430	103	5.82524
1	1735555	84	7.14286
1	1735572	83	12.0482
1	1735636	106	7.54717
1	1735741	88	82.9545
1	1735811	113	4.42478
1	1736020	114	85.0877
1	1736082	87	20.6897
1	1736102	100	7
1	1736176	106	27.3585
1	1736683	99	88.8889
1	1736725	112	51.7857
1	1736755	115	80
1	1736864	115	25.2174
1	1737006	113	9.73451
1	1737009	114	20.1754
1	1737090	122	23.7705
1	1737271	125	6.4
1	1737442	136	3.67647
1	1737448	141	87.234
1	1737656	79	56.962
1	1739390	47	10.6383
1	1739968	131	26.7176
1	1740190	140	5
1	1740459	107	13.0841
1	1741578	139	5.03597
1	1742125	147	11.5646
1	1742834	125	5.6
1	1742907	133	3.7594
1	1742962	128	36.7188
1	1743059	134	21.6418
1	1743699	106	43.3962
1	1743930	110	7.27273
1	1747336	50	30
1	1747486	57	33.3333
1	1748063	46	21.7391
1	1748203	52	28.8462
1	1748205	24	25
1	1748395	68	14.7059
1	1749012	71	7.04225
1	1749042	76	7.89474
1	1749151	84	39.2857
1	1749197	95	33.6842
1	1749862	188	9.57447
1	1749876	197	3.04569
1	1750205	173	10.4046
1	1750422	159	11.3208
1	1750729	201	8.95522
1	1751539	235	18.7234
1	1754628	117	5.12821
1	1756486	36	33.3333
1	1757021	14	64.2857
1	1760155	253	26.087
1	1760279	226	15.4867
1	1760879	235	21.7021
1	1760980	257	6.22568
1	1761131	275	3.63636
1	1761614	313	19.1693
1	1761843	282	7.44681
1	1762204	112	4.46429
1	1769686	256	15.2344
1	1770968	630	11.746
1	1771017	675	37.3333
1	1771278	598	40.8027
1	1771345	644	31.2112
1	1771393	693	5.05051
1	1771629	670	52.3881
1	1772292	471	3.39703
1	1772308	407	32.1867
1	1773176	1304	8.12883
1	1776851	365	27.6712
1	1777082	388	5.6701
1	1777166	359	33.9833
1	1781728	233	3.43348
1	1799277	18	27.7778
1	1799623	16	68.75
1	1800220	14	50
1	1800299	15	46.6667
1	1800660	31	67.7419
1	1801213	53	9.43396
1	1801320	36	61.1111
1	1801377	25	44
1	1801789	44	11.3636
1	1803088	41	31.7073
1	1806748	213	3.75587
1	1808985	248	8.06452
1	1814629	2052	4.62963
1	1815052	1058	10.6805
1	1815546	221	3.61991
1	1815806	233	6.86695
1	1815956	163	19.0184
1	1816082	169	8.87574
1	1816741	279	15.4122
1	1816755	271	11.4391
1	1817069	246	7.72358
1	1817246	272	22.0588
1	1817417	306	15.6863
1	1817582	263	3.04183
1	1817845	47	14.8936
1	1826380	14	35.7143
1	1826612	163	20.2454
1	1826991	327	24.159
1	1827109	309	39.4822
1	1827145	304	41.1184
1	1827397	284	5.98592
1	1827621	274	36.1314
1	1828016	302	42.7152
1	1828513	293	46.7577
1	1828707	242	47.1074
1	1832741	160	34.375
1	1832777	154	9.74026
1	1832995	114	28.9474
1	1833129	162	3.08642
1	1833253	141	12.766
1	1833335	152	8.55263
1	1833506	154	24.6753
1	1833651	126	30.1587
1	1835017	217	14.7465
1	1835170	123	28.4553
1	1835379	79	7.59494
1	1835435	94	15.9574
1	1835533	132	7.57576
1	1835849	135	52.5926
1	1836005	79	63.2911
1	1836144	83	36.1446
1	1837094	122	72.9508
1	1837129	117	4.2735
1	1837144	120	33.3333
1	1837200	125	69.6
1	1837273	118	74.5763
1	1837418	114	76.3158
1	1837721	126	78.5714
1	1837757	100	50
1	1838762	96	6.25
1	1842047	292	16.4384
1	1842405	826	20.9443
1	1847012	70	67.1429
1	1847782	33	15.1515
1	1848415	17	41.1765
1	1848547	18	38.8889
1	1849054	31	67.7419
1	1849456	32	15.625
1	1850441	53	60.3774
1	1851627	60	15
1	1851800	75	10.6667
1	1851844	81	39.5062
1	1851862	86	9.30233
1	1851904	78	35.8974
1	1851954	85	15.2941
1	1851981	79	31.6456
1	1852577	100	55
1	1852643	108	34.2593
1	1852759	101	31.6832
1	1852763	98	31.6327
1	1852862	96	44.7917
1	1852943	135	5.18519
1	1853021	143	35.6643
1	1853388	129	52.7132
1	1853472	149	14.094
1	1853484	148	18.9189
1	1853850	172	53.4884
1	1853894	164	9.7561
1	1853971	155	52.9032
1	1854021	167	5.38922
1	1854022	167	3.59281
1	1854103	151	15.2318
1	1854165	122	31.1475
1	1854383	51	13.7255
1	1856446	122	23.7705
1	1857031	113	7.07965
1	1857095	87	11.4943
1	1857256	95	8.42105
1	1857606	115	6.95652
1	1857614	123	4.06504
1	1867801	13	61.5385
1	1874426	36	52.7778
1	1878961	109	15.5963
1	1879249	97	11.3402
1	1879361	95	23.1579
1	1879608	115	21.7391
1	1879629	114	13.1579
1	1879759	111	23.4234
1	1880366	84	8.33333
1	1880494	59	10.1695
1	1881953	608	9.86842
1	1884968	243	3.7037
1	1885887	298	5.7047
1	1886991	200	14.5
1	1887018	193	7.77202
1	1887314	223	10.7623
1	1887457	182	19.2308
1	1887543	206	13.1068
1	1888088	94	7.44681
1	1890328	197	28.4264
1	1890499	148	19.5946
1	1890553	95	36.8421
1	1891903	244	14.3443
1	1892150	306	7.18954
1	1892188	360	13.3333
1	1892326	498	9.23695
1	1892434	557	4.8474
1	1892801	389	12.5964
1	1892836	387	8.01034
1	1892937	436	14.9083
1	1899107	351	24.2165
1	1899110	349	3.15186
1	1899148	305	12.7869
1	1899375	306	35.9477
1	1899607	361	30.4709
1	1899975	240	5.41667
1	1900267	222	47.2973
1	1900504	269	44.6097
1	1900696	188	26.5957
1	1900699	197	45.6853
1	1900894	199	5.02513
1	1900933	216	19.9074
1	1901113	274	11.3139
1	1901356	183	32.2404
1	1901440	134	45.5224
1	1901525	175	22.2857
1	1901995	179	44.1341
1	1902661	146	6.16438
1	1905733	104	5.76923
1	1910183	490	7.7551
1	1910452	1244	10.2894
1	1910473	1206	10.3648
1	1910533	1319	6.74754
1	1910878	1564	6.26598
1	1910899	1504	7.11436
1	1911049	1176	3.40136
1	1911068	1113	8.08625
1	1917109	42	11.9048
1	1917821	53	9.43396
1	1919587	255	19.2157
1	1919637	245	3.26531
1	1919660	223	32.7354
1	1919709	226	25.6637
1	1919937	312	23.7179
1	1920044	283	9.89399
1	1920083	290	35.8621
1	1920210	279	4.6595
1	1920276	216	9.72222
1	1920302	167	3.59281
1	1929428	676	14.497
1	1929777	500	6.6
1	1929792	484	4.54545
1	1931109	274	5.83942
1	1931694	149	3.3557
1	1937989	55	27.2727
1	1938459	56	8.92857
1	1938737	79	22.7848
1	1938954	227	3.0837
1	1939095	212	3.77358
1	1939151	201	26.8657
1	1939274	228	23.2456
1	1939353	258	9.30233
1	1939538	232	3.87931
1	1939810	228	4.38596
1	1939828	249	12.4498
1	1940078	224	7.58929
1	1941154	276	19.2029
1	1942057	246	8.53659
1	1942864	198	3.0303
1	1942891	199	4.0201
1	1947035	182	9.34066
1	1947255	205	4.39024
1	1947489	77	15.5844
1	1948706	71	15.493
1	1949268	28	21.4286
1	1950457	501	70.6587
1	1950703	773	77.8784
1	1950757	686	26.3848
1	1951222	711	73.8397
1	1951319	705	86.2411
1	1951409	664	59.0361
1	1951574	570	7.7193
1	1951688	619	83.8449
1	1951747	572	24.3007
1	1951852	633	11.6904
1	1952419	851	9.51821
1	1952531	574	14.2857
1	1952590	409	4.88998
1	1955521	107	16.8224
1	1956885	267	55.8052
1	1957012	529	37.8072
1	1957190	593	13.828
1	1957781	477	4.8218
1	1957953	385	16.8831
1	1958297	441	50.7937
1	1958583	292	49.6575
1	1958678	276	50
1	1958841	497	5.6338
1	1958883	461	74.1866
1	1959221	406	5.41872
1	1959355	487	4.51745
1	1959418	386	3.88601
1	1962419	387	7.75194
1	1962542	441	7.02948
1	1962794	404	11.3861
1	1963373	407	7.86241
1	1963634	423	10.4019
1	1963694	441	6.12245
1	1964564	495	3.43434
1	1964998	498	8.83534
1	1965332	558	3.58423
1	1976279	53	15.0943
1	1976405	55	27.2727
1	1976461	56	44.6429
1	1976588	50	10
1	1976853	42	26.1905
1	1976927	41	63.4146
1	1977158	56	30.3571
1	1977189	61	27.8689
1	1977205	57	35.0877
1	1977569	64	42.1875
1	1977578	67	43.2836
1	1977670	72	45.8333
1	1977713	53	32.0755
1	1978361	92	39.1304
1	1978364	91	29.6703
1	1978669	88	27.2727
1	1978716	90	16.6667
1	1978811	92	36.9565
1	1979173	102	4.90196
1	1979240	86	31.3953
1	1984756	36	27.7778
1	1985134	69	7.24638
1	1985809	65	7.69231
1	1987426	443	3.61174
1	1987778	386	67.3575
1	1987784	402	83.0846
1	1987829	406	87.4384
1	1987974	392	93.8776
1	1988047	334	5.38922
1	1988218	357	25.2101
1	1988524	501	91.4172
1	1988676	262	5.72519
1	1994066	51	9.80392
1	1995047	57	43.8596
1	1997196	333	6.00601
1	1997477	334	8.68263
1	1997479	337	3.85757
1	1999272	120	25
1	1999275	115	31.3043
1	1999411	120	7.5
1	1999977	112	8.92857
1	2000992	137	6.56934
1	2004477	18	33.3333
1	2005413	21	38.0952
1	2006645	90	15.5556
1	2006876	72	6.94444
1	2010930	76	26.3158
1	2011296	105	10.4762
1	2011686	106	23.5849
1	2011947	121	11.5702
1	2014960	260	23.8462
1	2021319	496	5.04032
1	2022121	453	5.51876
1	2022536	374	3.74332
1	2023065	431	13.9211
1	2023090	436	32.3394
1	2023390	332	6.62651
1	2023412	346	4.91329
1	2023545	443	5.86907
1	2028170	408	4.16667
1	2028249	385	17.9221
1	2028789	340	7.05882
1	2028969	393	29.5165
1	2029153	501	3.99202
1	2029185	528	11.553
1	2029250	532	14.0977
1	2029821	521	8.06142
1	2029903	581	16.8675
1	2030056	538	21.3755
1	2030067	568	12.5
1	2030153	616	15.5844
1	2030850	456	19.5175
1	2031093	491	21.5886
1	2031697	389	11.5681
1	2031702	389	23.6504
1	2031868	565	4.77876
1	2032294	389	15.1671
1	2032504	616	19.1558
1	2032835	437	13.9588
1	2033071	583	24.0137
1	2033170	517	13.1528
1	2033527	492	16.0569
1	2033983	600	26.3333
1	2034173	652	3.06748
1	2034862	601	5.32446
1	2035942	686	18.5131
1	2035999	710	13.8028
1	2036413	637	17.8964
1	2036493	629	3.6566
1	2036587	622	12.701
1	2036710	654	18.8073
1	2037106	580	6.55172
1	2037147	584	13.3562
1	2037385	544	16.5441
1	2037454	576	7.8125
1	2037667	828	13.6473
1	2038195	599	12.187
1	2038666	696	15.9483
1	2039016	559	13.5957
1	2039173	697	12.769
1	2039685	744	5.37634
1	2039821	804	21.8905
1	2041457	1877	12.147
1	2044479	90	5.55556
1	2045079	92	5.43478
1	2045587	162	4.93827
1	2045626	245	14.6939
1	2045677	362	17.4033
1	2047994	171	4.67836
1	2048289	314	3.50318
1	2049562	198	67.6768
1	2049687	438	60.9589
1	2050835	543	42.7256
1	2051074	662	47.432
1	2054061	49	14.2857
1	2054538	221	6.78733
1	2058522	54	9.25926
1	2061488	16	56.25
1	2063697	636	15.4088
1	2064040	44	13.6364
1	2064093	314	3.18471
1	2064350	450	5.33333
1	2064638	638	20.3762
1	2064679	615	22.1138
1	2064755	588	21.5986
1	2064878	467	6.42398
1	2065007	415	11.8072
1	2066076	419	8.59189
1	2067786	278	17.2662
1	2069811	702	7.12251
1	2072159	458	40.8297
1	2072406	515	5.04854
1	2072556	459	14.5969
1	2072577	447	29.0828
1	2072801	476	3.57143
1	2073133	412	4.12621
1	2073156	448	4.24107
1	2073187	463	32.1814
1	2073266	522	15.1341
1	2073562	505	28.1188
1	2073760	397	27.204
1	2077151	47	12.766
1	2077260	47	27.6596
1	2077524	53	84.9057
1	2077641	61	72.1311
1	2077678	64	73.4375
1	2077776	76	48.6842
1	2078129	86	46.5116
1	2078322	60	86.6667
1	2078687	86	61.6279
1	2078868	108	19.4444
1	2079450	77	70.1299
1	2079565	97	63.9175
1	2079648	93	29.0323
1	2079702	102	6.86275
1	2079762	106	22.6415
1	2079990	98	17.3469
1	2080203	104	5.76923
1	2080451	121	76.0331
1	2080758	119	36.9748
1	2080977	162	69.1358
1	2081020	158	8.86076
1	2081404	114	5.26316
1	2081724	125	68.8
1	2081747	132	43.9394
1	2081763	130	3.84615
1	2082141	152	17.7632
1	2082294	155	21.9355
1	2082805	136	3.67647
1	2082993	155	24.5161
1	2083213	150	6
1	2083377	171	4.67836
1	2083380	166	3.61446
1	2083722	168	70.8333
1	2083929	147	10.2041
1	2083938	145	68.9655
1	2084091	122	41.8033
1	2084118	131	39.6947
1	2084166	139	10.0719
1	2084168	135	5.92593
1	2084507	140	8.57143
1	2084582	136	4.41176
1	2084585	132	4.54545
1	2086079	294	6.12245
1	2088950	20	45
1	2089313	33	24.2424
1	2099980	109	8.25688
1	2101472	18	27.7778
1	2102021	283	5.65371
1	2102981	40	12.5
1	2103041	29	27.5862
1	2103136	45	13.3333
1	2103894	45	13.3333
1	2103903	46	10.8696
1	2103930	42	23.8095
1	2104192	52	9.61538
1	2104312	70	12.8571
1	2105924	539	6.12245
1	2107612	136	67.6471
1	2107711	203	47.7833
1	2107733	190	17.8947
1	2108065	229	20.0873
1	2108072	223	13.0045
1	2108156	192	48.4375
1	2108202	199	3.51759
1	2108403	184	48.3696
1	2108653	247	3.64372
1	2109305	190	33.6842
1	2109815	204	3.43137
1	2109872	226	9.29204
1	2110814	145	19.3103
1	2112567	13	38.4615
1	2114219	20	25
1	2115699	19	26.3158
1	2115775	17	41.1765
1	2117252	239	15.0628
1	2117290	335	7.76119
1	2117303	343	25.656
1	2117529	559	26.1181
1	2117897	523	23.7094
1	2118278	424	17.6887
1	2118385	400	19.5
1	2119644	400	21.75
1	2121540	93	11.828
1	2125161	69	14.4928
1	2125268	165	3.0303
1	2125320	187	9.09091
1	2125399	227	12.7753
1	2125403	230	7.3913
1	2125811	227	9.2511
1	2126006	186	60.2151
1	2126162	182	13.1868
1	2126294	135	84.4444
1	2127079	53	11.3208
1	2127383	104	66.3462
1	2127426	112	22.3214
1	2128523	285	3.15789
1	2129102	360	13.3333
1	2129119	386	11.658
1	2129268	393	23.6641
1	2129323	429	3.0303
1	2130088	309	5.82524
1	2130363	339	22.4189
1	2130497	295	6.10169
1	2130519	297	23.569
1	2130720	212	28.3019
1	2131954	1524	12.5984
1	2132855	1802	4.10655
1	2133287	1338	8.44544
1	2133756	1288	7.91925
1	2134230	92	18.4783
1	2147273	130	4.61538
1	2148768	244	39.3443
1	2148945	187	27.8075
1	2149038	179	5.58659
1	2150362	232	9.48276
1	2150478	192	4.16667
1	2151840	130	3.84615
1	2155591	74	21.6216
1	2155659	102	9.80392
1	2155998	44	50
1	2156879	31	16.129
1	2157042	22	36.3636
1	2165887	127	3.93701
1	2168139	214	6.54206
1	2171032	100	11
1	2173933	41	17.0732
1	2175430	62	37.0968
1	2175658	63	7.93651
1	2175784	88	32.9545
1	2175850	94	8.51064
1	2176144	105	19.0476
1	2176527	80	10
1	2176852	85	31.7647
1	2176876	103	7.76699
1	2176997	115	15.6522
1	2177005	117	17.9487
1	2177235	109	4.58716
1	2177572	114	5.26316
1	2177681	83	9.63855
1	2181794	102	40.1961
1	2182208	128	9.375
1	2182613	122	40.9836
1	2183606	240	7.08333
1	2183867	216	73.6111
1	2184178	153	8.49673
1	2184535	280	28.9286
1	2184758	316	3.48101
1	2184763	307	25.7329
1	2184765	84	5.95238
1	2184975	307	57.9805
1	2185104	283	19.788
1	2185186	248	55.6452
1	2185521	233	6.86695
1	2185595	195	31.2821
1	2185725	34	17.6471
1	2186606	765	23.0065
1	2187143	679	5.59647
1	2187170	667	4.94753
1	2187337	702	12.963
1	2187528	729	9.73937
1	2187670	567	3.88007
1	2187777	591	23.8579
1	2187825	663	19.9095
1	2187973	579	4.14508
1	2187987	528	5.87121
1	2188598	29	51.7241
1	2188958	45	40
1	2189044	38	52.6316
1	2190152	38	23.6842
1	2190599	34	29.4118
1	2192614	156	10.2564
1	2192845	174	5.74713
1	2193439	172	6.97674
1	2193566	175	8.57143
1	2193596	171	11.6959
1	2194845	35	20
1	2201916	193	3.62694
1	2207206	29	17.2414
1	2211615	111	4.5045
1	2212164	119	5.04202
1	2212902	73	6.84932
1	2214174	146	6.84932
1	2214215	303	11.5512
1	2214964	1021	24.6817
1	2217334	431	4.64037
1	2218556	366	15.0273
1	2219341	182	3.84615
1	2219389	180	4.44444
1	2219555	211	3.79147
1	2220284	228	5.26316
1	2220788	182	4.94505
1	2221323	257	6.61479
1	2221551	188	7.44681
1	2221800	172	6.39535
1	2221827	163	12.8834
1	2222190	169	8.87574
1	2222364	103	11.6505
1	2222553	152	5.26316
1	2222616	168	7.7381
1	2222772	157	7.00637
1	2223100	166	7.22892
1	2224238	121	4.13223
1	2224504	161	4.96894
1	2224554	163	3.06748
1	2225600	116	9.48276
1	2228926	63	7.93651
1	2249348	112	30.3571
1	2250728	10	60
1	2251506	379	5.5409
1	2251508	17	76.4706
1	2251661	17	47.0588
1	2252546	175	6.85714
1	2253132	145	32.4138
1	2253271	132	7.57576
1	2253851	136	62.5
1	2254208	166	61.4458
1	2254495	44	77.2727
1	2254535	29	34.4828
1	2254550	19	36.8421
1	2255015	62	25.8065
1	2255060	68	35.2941
1	2255064	70	10
1	2255204	55	89.0909
1	2255288	42	28.5714
1	2256054	54	87.037
1	2256095	62	45.1613
1	2256196	61	11.4754
1	2256916	84	58.3333
1	2257541	55	16.3636
1	2257568	51	76.4706
1	2257669	43	90.6977
1	2258087	62	9.67742
1	2258343	37	78.3784
1	2258350	36	69.4444
1	2258365	40	87.5
1	2259143	83	51.8072
1	2259641	290	3.44828
1	2259707	252	48.4127
1	2259753	218	9.63303
1	2260057	226	3.09735
1	2260095	239	33.8912
1	2260097	239	28.4519
1	2260336	250	20
1	2261249	220	5.90909
1	2261259	234	6.41026
1	2262080	351	9.11681
1	2262125	333	3.6036
1	2263781	407	23.3415
1	2264402	434	4.60829
1	2264676	387	21.7054
1	2265799	366	12.8415
1	2269240	273	17.5824
1	2269300	233	4.72103
1	2269480	284	5.98592
1	2269507	286	6.29371
1	2269612	290	6.55172
1	2270779	209	3.34928
1	2271077	164	9.7561
1	2285731	18	55.5556
1	2285851	17	29.4118
1	2287401	26	26.9231
1	2287545	21	33.3333
1	2293642	16	37.5
1	2303253	301	6.97674
1	2303524	370	6.48649
1	2306497	96	14.5833
1	2306830	88	10.2273
1	2308106	104	4.80769
1	2313266	171	6.43275
1	2313776	118	15.2542
1	2315733	159	3.14465
1	2316378	180	3.33333
1	2316746	209	67.4641
1	2316987	210	13.8095
1	2317184	202	67.3267
1	2317271	254	17.7165
1	2317325	298	27.5168
1	2317550	228	3.50877
1	2318181	1777	29.713
1	2318217	1771	5.13834
1	2318614	2478	3.30912
1	2319153	35	37.1429
1	2320193	381	3.41207
1	2320457	338	5.32544
1	2321230	331	4.22961
1	2321233	335	5.37313
1	2321921	84	5.95238
1	2325505	111	4.5045
1	2325774	126	15.0794
1	2325910	136	15.4412
1	2325954	124	12.9032
1	2326640	126	5.55556
1	2329340	241	5.80913
1	2329797	283	5.30035
1	2330480	214	13.0841
1	2340565	98	9.18367
1	2340707	157	3.18471
1	2340752	158	31.0127
1	2340850	172	40.6977
1	2341168	197	10.6599
1	2341247	192	45.3125
1	2341444	166	22.8916
1	2341577	176	44.8864
1	2341649	145	8.27586
1	2341652	139	12.2302
1	2341954	137	3.64964
1	2342016	163	40.4908
1	2342921	74	22.973
1	2343888	82	8.53659
1	2344574	88	25
1	2347648	87	5.74713
1	2351211	202	5.44554
1	2351673	228	3.94737
1	2351910	185	3.24324
1	2351955	166	17.4699
1	2352306	238	5.46218
1	2352669	306	15.0327
1	2353128	338	5.32544
1	2353252	340	21.1765
1	2366071	56	19.6429
1	2366512	84	5.95238
1	2366673	78	23.0769
1	2366760	74	12.1622
1	2368074	136	11.7647
1	2376586	88	11.3636
1	2376953	73	30.137
1	2377306	133	32.3308
1	2377924	113	9.73451
1	2377986	112	34.8214
1	2378006	111	28.8288
1	2378093	95	33.6842
1	2378510	121	23.1405
1	2378528	114	16.6667
1	2378855	94	6.38298
1	2379723	102	9.80392
1	2379763	147	12.2449
1	2379859	234	5.12821
1	2380705	201	22.8856
1	2380866	209	21.5311
1	2385758	168	15.4762
1	2386349	197	6.09137
1	2386500	231	10.3896
1	2386600	215	7.90698
1	2386752	231	6.49351
1	2387278	101	10.8911
1	2387512	96	5.20833
1	2387576	114	22.807
1	2387770	204	31.8627
1	2394060	298	8.38926
1	2394062	300	6.33333
1	2394291	1012	7.21344
1	2394324	1034	4.35203
1	2394480	952	17.437
1	2394673	687	13.5371
1	2394805	812	12.931
1	2394910	976	3.17623
1	2394955	894	18.0089
1	2395201	725	12.9655
1	2395412	685	15.0365
1	2395413	33	27.2727
1	2395652	820	21.2195
1	2396018	958	18.6848
1	2401495	219	5.47945
1	2401756	177	29.3785
1	2402182	198	16.1616
1	2402335	190	8.94737
1	2402344	196	35.2041
1	2404217	228	3.50877
1	2406696	170	3.52941
1	2409143	207	3.38164
1	2414539	117	7.69231
1	2414567	40	27.5
1	2414740	45	24.4444
1	2415881	210	11.9048
1	2416802	313	15.9744
[truncated: 24,058 more rows]
