# Supplementary material for: Genome-wide A-to-I RNA editing in fungi independent of ADAR enzymes
Source: Genome Res. 2016 Apr;26(4):499–509. doi: 10.1101/gr.199877.115 (PMC4817773; doi:10.1101/gr.199877.115)
Supplement: Supplemental Material [file supp_gr.199877.115_Supplemental_Table_1.xlsx]

## Sheet: Sheet3
	Supplemental Table 1. RNA-seq and DNA-seq data used in this study.
	Organism	Sample	SRA_Run	Library	Read length	Input reads	Mapped reads	Mapped unduplicated reads	Genome coverage	Reference
	F. graminearum	PH1-7d-P	SRR3030980	DNA-seq	2×101 bp	33466822	32207977	31847417	95×	This study
	F. graminearum	Sex8d-1	SRR2182499	Strand-specific RNA-seq	2×150 bp	38129316	31266581	24052179	71×	This study
	F. graminearum	Sex8d-2	SRR2182501	Strand-specific RNA-seq	2×150 bp	39488400	32072295	24536555	73×	This study
	F. graminearum	Coni_1	SRR2182470	Strand-specific RNA-seq	2×150 bp	34440860	21514447	17712683	53×	This study
	F. graminearum	Coni_2	SRR2182494	Strand-specific RNA-seq	2×150 bp	34850666	18161390	12960361	38×	This study
	F. graminearum	Hy24h_1	SRR2182495	Strand-specific RNA-seq	2×150 bp	37385476	26064232	19200994	57×	This study
	F. graminearum	Hy24h_2	SRR2182497	Strand-specific RNA-seq	2×150 bp	35940524	25736224	19119991	57×	This study
	F. verticillioides	Hyphae_2h	SRR1592416	Standard (unstranded) RNA-seq	35 bp	32601337	28452151			Sikhakolli et al. 2012
	F. verticillioides	Perithecia_4d	SRR1592420	Standard (unstranded) RNA-seq	35 bp	35199265	33594631			Sikhakolli et al. 2012
	N. crassa	Hyphae_0h	SRR585669	Standard (unstranded) RNA-seq	36 bp	24356817	22796319			Wang et al. 2014
	N. crassa	Perithecia_5d	SRR585675	Standard (unstranded) RNA-seq	36 bp	32760913	30688789			Wang et al. 2014
