# Supplementary material for: Genome-wide A-to-I RNA editing in fungi independent of ADAR enzymes
Source: Genome Res. 2016 Apr;26(4):499–509. doi: 10.1101/gr.199877.115 (PMC4817773; doi:10.1101/gr.199877.115)
Supplement: Supplemental Material [file supp_gr.199877.115_Supplemental_Table_2.xlsx]

## Sheet: Sheet2
	Supplemental Table 2. Nucleotide variant sites identified in RNA-Seq data of F. graminearum.
	Type	RNA-seq
		Perithecia				Conidia			Hyphae
		Rep1	Rep2	Overlap	Combined	Rep1	Rep2	Overlap	Rep1	Rep2	Overlap
	A→C	7	3	2	12	8	4	0	10	10	5
	A→G	22578	19261	17613	26056	67	69	24	111	113	53
	A→T	5	9	2	13	7	5	1	9	11	7
	C→A	51	89	29	177	70	63	21	89	89	44
	C→G	8	5	3	16	8	5	6	6	12	7
	C→T	21	10	7	22	8	5	1	15	10	5
	G→A	39	60	16	105	44	40	10	51	53	21
	G→C	8	12	5	30	9	7	3	15	18	8
	G→T	26	23	11	42	14	33	8	27	28	9
	T→A	87	136	40	297	95	100	31	117	137	59
	T→C	191	125	55	465	64	33	19	67	66	23
	T→G	20	31	11	66	25	22	13	29	34	16
	Total	23041	19764	17794	27301	419	386	137	546	581	257
