# Supplementary material for: Genome-wide A-to-I RNA editing in fungi independent of ADAR enzymes
Source: Genome Res. 2016 Apr;26(4):499–509. doi: 10.1101/gr.199877.115 (PMC4817773; doi:10.1101/gr.199877.115)
Supplement: Supplemental Material [file supp_gr.199877.115_Supplemental_Table_3.xlsx]

## Sheet: Table S3
	Supplemental Table 3. F. graminearum genes with the stop loss editing events.
	Chr	Region	Count	Coverage	Editing level	Gene ID	Annotation	Reference
	1	2254495	34	44	77.2727	FGRRES_00696	RNA polymerase I specific transcription initiation factor	Son et al., 2011
	1	8392261	157	298	52.6846	FGRRES_02608	CCAAT-binding transcription factor subunit aab-1	Son et al., 2011
	3	1803422	130	258	50.3876	FGRRES_05304	Histone-like transcription factor	Son et al., 2011
	4	7860814	51	120	42.5	FGRRES_09000	Single-stranded DNA binding protein	Son et al., 2011
	2	2039803	33	83	39.759	FGRRES_08617	Zinc finger protein	Son et al., 2011
	2	7320280	47	219	21.4612	FGRRES_04220	Transcription factor Cdc10	Son et al., 2011
	1	1514267	69	324	21.2963	FGRRES_00477	C2H2 finger domain protein	Son et al., 2011
	1	1243697	765	5112	14.9648	FGRRES_00385	Structure-specific recognition protein 1	Son et al., 2011
	1	6302824	125	972	12.8601	FGRRES_01915	Myb-like DNA-binding protein	Son et al., 2011
	3	4914182	31	308	10.0649	FGRRES_06291	Transcriptional activator Spt7	Son et al., 2011
	3	2478983	55	289	19.0311	FGRRES_05503	Nitrate assimilation regulatory protein nirA	Son et al., 2011
	1	1713975	60	91	65.9341	FGRRES_00543	Cdc14	Li et al., 2015
	2	2095332	148	227	65.1982	FGRRES_08635	Serine threonine-protein kinase sid2	Wang et al., 2011
	2	1524539	174	294	59.1837	FGRRES_08468	Cdc2A protein kinase	Liu et al., 2015
	2	8193706	54	196	27.551	FGRRES_04484	Ssn3 protein kinase	Wang et al., 2011
	3	3224809	50	197	25.3807	FGRRES_05734	Ste20 protein kinase	Wang et al., 2011
	1	1068933	45	219	20.5479	FGRRES_00337	Cmk2 protein kinase	Wang et al., 2011
	1	4989243	16	129	12.4031	FGRRES_01506_M	Chk1 protein kinase	Wang et al., 2011
	1	4521081	14	209	6.69856	FGRRES_01364	Voltage gated ca2+ channel	Hallen and Trail 2008
	1	8268817	222	556	39.9281	FGRRES_02572	Universal stress protein	Kim et al., 2015
	3	5497718	29	103	28.1553	FGRRES_10742	Plasma membrane fusion protein prm1	Kim et al., 2015
	4	396912	322	337	95.549	FGRRES_16674	Hypothetical protein
	4	6009354	435	459	94.7712	FGRRES_17240	Hypothetical protein
	3	6767879	55	59	93.2203	FGRRES_11153	Hypothetical protein
	4	608555	489	542	90.2214	FGRRES_15372_06616_M	Glucan-beta-glucosidase
	4	2777453	14	16	87.5	FGRRES_20358	Hypothetical protein
	3	2619548	83	95	87.3684	FGRRES_16495	Hypothetical protein
	1	951166	447	514	86.965	FGRRES_00301	Maintenance-ploidy protein mob1
	1	580351	266	321	82.866	FGRRES_11698	ADP-ribose pyrophosphatase
	4	3043159	194	235	82.5532	FGRRES_16808	Hypothetical protein
	2	2628379	174	211	82.4645	FGRRES_08782_M	Hypothetical protein
	1	9135631	473	579	81.6926	FGRRES_09895	Neutral trehalase
	4	6079138	102	126	80.9524	FGRRES_20386	Hypothetical protein
	1	10527258	931	1162	80.1205	FGRRES_10324	Hypothetical protein
	1	3752123	57	72	79.1667	FGRRES_01146	Hypothetical protein
	1	8428304	75	95	78.9474	FGRRES_02618	Hypothetical protein
	2	5973527	71	90	78.8889	FGRRES_03748	Hypothetical protein
	1	4159157	172	228	75.4386	FGRRES_01261	Hypothetical protein
	1	1421277	26	36	72.2222	FGRRES_00441	Hypothetical protein
	2	1802062	104	144	72.2222	FGRRES_08547_M	Hypothetical protein
	1	1015272	118	178	66.2921	FGRRES_00322_M	Hypothetical protein
	3	3765437	61	93	65.5914	FGRRES_12842	Hypothetical protein
	1	1268324	369	564	65.4255	FGRRES_00394	Hypothetical protein
	4	1209903	121	187	64.7059	FGRRES_06781	Anaphase-promoting complex subunit 8
	1	2714698	405	637	63.5793	FGRRES_00831	Mechanosensitive ion channel
	3	5020756	36	58	62.069	FGRRES_12906	Hypothetical protein
	1	1390141	47	78	60.2564	FGRRES_00431_M	Hypothetical protein
	2	3879129	10	17	58.8235	FGRRES_12542	Hypothetical protein
	1	1737656	45	79	56.962	FGRRES_17603_M	Fanconi anemia group M protein
	2	1136717	79	139	56.8345	FGRRES_17053	Hypothetical protein
	3	1206567	87	162	53.7037	FGRRES_05115	Hypothetical protein
	4	3346477	117	224	52.2321	FGRRES_07376	Copper homeostasis protein
	1	631910	83	162	51.2346	FGRRES_00193	Hypothetical protein
	3	4885095	308	609	50.5747	FGRRES_06285	Membrane protein
	2	7938781	238	539	44.1558	FGRRES_04417	Hypothetical protein
	4	2917639	108	262	41.2214	FGRRES_07256	CTD kinase subunit gamma
	2	3464611	236	579	40.7599	FGRRES_02812	WD domain containing protein
	1	5517783	69	179	38.5475	FGRRES_01657	UPF0645 membrane protein
	3	3965884	174	474	36.7089	FGRRES_16585	Hypothetical protein
	2	4748920	34	93	36.5591	FGRRES_03297	Hypothetical protein FGSG_03297
	2	2774538	101	299	33.7793	FGRRES_08818	Hypothetical protein
	4	5658037	233	804	28.9801	FGRRES_09704	Glycogen debranching enzyme
	1	3736285	94	350	26.8571	FGRRES_01142	Hypothetical protein
	3	3275567	40	157	25.4777	FGRRES_05749	Hypothetical protein
	4	7344465	30	122	24.5902	FGRRES_17171	Fusarubin cluster-transcription factor
	3	1608282	41	171	23.9766	FGRRES_05236	Thimet oligopeptidase
	1	6699907	177	810	21.8519	FGRRES_02027	Hypothetical protein
	4	279091	29	151	19.2053	FGRRES_16669	RNA-dependent RNA polymerase QDE-1
	1	1952531	82	574	14.2857	FGRRES_00612	Mannosyl-oligosaccharide alpha-mannosidase
	4	552349	7	50	14	FGRRES_06601_M	Hypothetical protein
	1	1957190	82	593	13.828	FGRRES_00614_M	Hypothetical protein
	4	4970580	554	4427	12.5141	FGRRES_07944_M	Cell wall glucanase
	3	712535	10	87	11.4943	FGRRES_20242	Hypothetical protein
	4	7763486	5	45	11.1111	FGRRES_13504	Hypothetical protein
	1	10142835	25	230	10.8696	FGRRES_13718	Hypothetical protein
	1	5146818	19	208	9.13462	FGRRES_01559	serine threonine protein kinase
	2	2692220	8	119	6.72269	FGRRES_16968	Hypothetical protein
	1	5860580	6	98	6.12245	FGRRES_01778	Hypothetical protein FGSG_01778
	4	1353980	35	585	5.98291	FGRRES_06822	Glycogen
	1	8378059	9	163	5.52147	FGRRES_02602	Histone H3-like centromeric protein Cse-4
	4	3541339	12	381	3.14961	FGRRES_07446	Hypothetical protein
	1	7141734	6	195	3.07692	FGRRES_02193	Hypothetical protein
	2	8120415	55	62	88.7097	FGRRES_04462	Hypothetical protein FGSG_04462
	1	10582026	109	123	88.6179	FGRRES_10343	Tripeptidyl-peptidase I
	1	7048972	13	15	86.6667	FGRRES_15942_12076_M	Hypothetical protein
	3	1488837	99	116	85.3448	FGRRES_05199	Hypothetical protein
	3	3213218	188	222	84.6847	FGRRES_05730	Hypothetical protein
	3	1871421	10	12	83.3333	FGRRES_15291	Hypothetical protein
	4	3871062	218	285	76.4912	FGRRES_07555	NET family protein
	2	6900983	39	51	76.4706	FGRRES_04086	Hypothetical protein
	4	1381351	1272	1678	75.8045	FGRRES_16723	Alpha-mannosidase
	2	6848392	9	12	75	FGRRES_16156	Hypothetical protein
	3	3302502	16	22	72.7273	FGRRES_05758	Hypothetical protein
	4	6661349	21	30	70	FGRRES_09408	G2-specific protein kinase nim-1
	1	6638754	47	73	64.3836	FGRRES_02009	Mediator subunit med11
	3	4022070	122	193	63.2124	FGRRES_06006	Frataxin-like protein
	1	1801320	22	36	61.1111	FGRRES_00565	M-phase inducer phosphatase
	1	9802221	151	250	60.4	FGRRES_10087	ATP-dependent rna helicase dbp5
	2	3036555	149	249	59.8394	FGRRES_16948	Hypothetical protein
	3	3751963	59	99	59.596	FGRRES_05910	Nuclear transport factor 2 domain containing protein
	1	4209881	54	92	58.6957	FGRRES_15839	Helicase of the snf2/rad54 family
	1	6215771	283	497	56.9416	FGRRES_15904	Cation diffusion facilitator 10
	1	5431017	52	92	56.5217	FGRRES_01633	Hypothetical protein
	3	2754952	71	129	55.0388	FGRRES_05580	Npy1-nadh pyrophosphatase I
	1	6642975	152	277	54.8736	FGRRES_02010	Transcription initiation factorTFIId subunit 5
	3	5169277	63	116	54.3103	FGRRES_06368	Cyclin-dependent kinase
	1	3719217	312	581	53.7005	FGRRES_01133	Phosphoacetylglucosamine mutase
	1	2259143	43	83	51.8072	FGRRES_11810	Hypothetical protein
	2	6707398	235	454	51.7621	FGRRES_04032	Ubiquitin-conjugating enzyme E2
	1	10386580	271	525	51.619	FGRRES_10271	RRM-type RNA binding protein
	4	6043558	63	125	50.4	FGRRES_09579	Sec5 protein
	3	2829054	79	157	50.3185	FGRRES_05600	Microsomal signal peptidase 25 kDa subunit
	2	7347839	10	20	50	FGRRES_04230	Chitosanase precursor
	2	1059065	152	306	49.6732	FGRRES_17708_M	Receptor expression-enhancing protein 4
	1	6516577	388	792	48.9899	FGRRES_15915	Ring finger protein
	1	2837379	90	185	48.6486	FGRRES_00864	Transcription initiation factor TFIId subunit 9b
	3	3652818	198	414	47.8261	FGRRES_05884	Cullin-associated NEDD8-dissociated protein 1
	4	469934	51	107	47.6636	FGRRES_06573	Hypothetical protein
	1	3480356	37	78	47.4359	FGRRES_01050	Hypothetical protein
	1	8327791	1079	2298	46.9539	FGRRES_02585	Hypothetical protein
	2	1186231	280	614	45.6026	FGRRES_17046	ABC transporter
	4	559529	19	42	45.2381	FGRRES_06605	Beta-glucosidase
	3	1636227	64	143	44.7552	FGRRES_05244	H/ACA ribonucleoprotein complex non-core subunit Naf1
	1	6737208	57	128	44.5312	FGRRES_02043	Glucose-repressible alcohol dehydrogenase transcriptional effector
	2	2425571	241	544	44.3015	FGRRES_08726	Hypothetical protein
	1	9481570	143	323	44.2724	FGRRES_09996	Hypothetical protein
	2	1248435	80	182	43.956	FGRRES_08392	N-terminal binuclear ZN cluster-containing DNA binding domain-containing protein
	4	1573226	95	220	43.1818	FGRRES_06886	Proteasome component pre2
	1	2454362	57	133	42.8571	FGRRES_00748	Nuclear transport factor
	3	2712914	199	466	42.7039	FGRRES_05567	Cbf1-centromere binding factor 1
	3	2471061	120	295	40.678	FGRRES_05500_M	Hypothetical protein
	3	3198397	47	122	38.5246	FGRRES_05723	Metal tolerance protein 5
	3	1113005	317	828	38.285	FGRRES_05082	Copi associated protein
	3	4926671	16	42	38.0952	FGRRES_16628	Hypothetical protein
	3	5273976	60	158	37.9747	FGRRES_06402	Nup53p-like partial
	3	2846971	28	74	37.8378	FGRRES_05608	PH-response regulator protein palc
	2	7242906	87	230	37.8261	FGRRES_04189	Gs1 protein
	1	1079099	23	61	37.7049	FGRRES_00339	Srp40-suppressor of mutant ac40 of RNA polymerase I and III
	3	4615046	165	441	37.415	FGRRES_16614	GTPase-activating protein beta-chimerin
	3	3133906	84	228	36.8421	FGRRES_05699	Hypothetical protein
	3	5671045	56	152	36.8421	FGRRES_10795	Cft2-cleavage and polyadenylation specificity part of cf II
	1	8226011	31	85	36.4706	FGRRES_16015	Increased rdna silencing protein irs4
	1	9863610	74	203	36.4532	FGRRES_10104	Muc1 extracellular alpha- -glucan glucosidase
	1	3697398	36	99	36.3636	FGRRES_01122	Borealin-like partial
	1	10660358	110	303	36.3036	FGRRES_10361	BZZ1-Myo3/5p-Bee1p-Vrp1p actin assembly complex component
	1	1467524	42	118	35.5932	FGRRES_00460	Nad-dependent histone deacetylase
	4	7270196	16	45	35.5556	FGRRES_09216	Corticosteroid 11-beta-dehydrogenase
	1	1629697	43	121	35.5372	FGRRES_00521	Hypothetical protein FGSG_00521
	1	8064885	78	223	34.9776	FGRRES_02507_M	E3 sumo-protein ligase pli1
	4	1860917	129	374	34.492	FGRRES_16751	Hypothetical protein
	4	3509417	13	38	34.2105	FGRRES_07431_M	Polyketide cyclase dehydrase and lipid transporter
	3	6063599	119	349	34.0974	FGRRES_10905	40s ribosomal protein s0
	1	7960877	46	135	34.0741	FGRRES_02472	Hypothetical protein
	4	5740013	65	192	33.8542	FGRRES_09673	DUF803 domain membrane protein
	4	1255298	241	715	33.7063	FGRRES_16719	Plasma membrane proteolipid 3
	2	2364887	37	111	33.3333	FGRRES_08708	Pali protein
	4	6171585	141	424	33.2547	FGRRES_09545_M	Mitochondrial import tom5 subunit
	3	4253225	134	411	32.6034	FGRRES_12866	Ubiquitin carboxyl-terminal hydrolase 2
	3	3723213	132	413	31.9613	FGRRES_12840	Muscle-derived protein
	1	2532159	58	182	31.8681	FGRRES_00780	Histone deacetylase 1 2
	1	10686436	88	277	31.769	FGRRES_10373	Vesicle-associated membrane protein-associated protein b
	4	3446529	65	207	31.401	FGRRES_16828	Cdk protein kinase
	4	1239419	137	449	30.5122	FGRRES_16717	Translation initiation factor 4e
	2	7110274	75	246	30.4878	FGRRES_04147	Transcription far1-related protein
	1	9388841	129	431	29.9304	FGRRES_09976	Hypothetical protein
	2	6744652	110	375	29.3333	FGRRES_04043	Hypothetical protein
	4	1033701	48	165	29.0909	FGRRES_06737	Protein af-9
	2	1940311	46	159	28.9308	FGRRES_08591_M	Hypothetical protein
	3	5091964	59	210	28.0952	FGRRES_06351	Histone promoter control 2
	4	871067	55	196	28.0612	FGRRES_06690	Integral membrane protein
	2	8064906	31	111	27.9279	FGRRES_12255	Hypothetical protein
	4	6715056	52	189	27.5132	FGRRES_09391	EF hand domain protein
	1	11177083	25	91	27.4725	FGRRES_10528	Related to microtubule associated protein
	1	8906365	66	242	27.2727	FGRRES_02771	Oxysterol binding protein
	4	7834916	30	111	27.027	FGRRES_09011	Transcription initiation factor TFIId subunit 6
	2	6833198	37	137	27.0073	FGRRES_16157	Stress response protein nst1
	4	1273125	37	137	27.0073	FGRRES_06799_M	Alkaline phosphatase d
	1	2465619	32	120	26.6667	FGRRES_00752	Protein polybromo-1
	1	3297505	141	537	26.257	FGRRES_00999	Hypothetical protein
	1	3126815	40	153	26.1438	FGRRES_00946	Heat shock factor protein
	2	2980759	6	23	26.087	FGRRES_08881_M	N-glycosylation protein eos1
	1	9131366	44	170	25.8824	FGRRES_09894	Yippee family protein
	1	1162394	82	317	25.8675	FGRRES_00358	Small nuclear ribonucleoprotein D1
	1	6409226	80	311	25.7235	FGRRES_12033	Dead deah box helicase
	1	877782	53	208	25.4808	FGRRES_00280_M	Histone acetyltransferase
	2	7424280	28	113	24.7788	FGRRES_04259	Snf7 protein
	3	2202393	84	341	24.6334	FGRRES_05417	RNA recognition domain-containing protein
	3	1810915	60	250	24	FGRRES_05307	Hypothetical protein
	1	10256961	27	113	23.8938	FGRRES_10230	4-coumarate-ligase
	2	2522620	9	38	23.6842	FGRRES_16977	Host-specific ak-toxin akt2
	3	4947573	8	34	23.5294	FGRRES_06302_M	Factor-induced protein 1
	4	243785	233	992	23.4879	FGRRES_06493	Gip2 glc7p-interacting protein
	2	6620688	10	43	23.2558	FGRRES_03996	Related to rabkinesin-6
	1	6877396	33	143	23.0769	FGRRES_02090	Inositol polyphosphate 5-phosphatase ocrl-1
	3	5481086	82	356	23.0337	FGRRES_17525	Hook3 protein
	2	2066834	19	83	22.8916	FGRRES_08627	Riboflavin kinase
	3	2261652	90	395	22.7848	FGRRES_05432	Phosphoinositide 3-phosphatase
	2	7082934	43	195	22.0513	FGRRES_04135	Hypothetical protein
	1	5334745	144	654	22.0183	FGRRES_11978	T-complex protein 11-like protein 1
	4	5853236	35	162	21.6049	FGRRES_09632	Zinc transporter
	4	3777803	11	51	21.5686	FGRRES_16842_M	Cellular myosin heavy type A
	1	7896645	208	970	21.4433	FGRRES_15999_M	D-serine dehydratase
	3	4339603	10	47	21.2766	FGRRES_06114	Alkaline phosphatase family protein
	2	3264053	35	165	21.2121	FGRRES_11590	Tad2-tRNA-specific adenosine deaminase 2
	1	2353252	72	340	21.1765	FGRRES_00719	Zinc finger transcription factor
	2	7225019	110	527	20.8729	FGRRES_04184	GYF domain-containing protein mpd2
	3	5667864	101	501	20.1597	FGRRES_17518	1-phosphatidylinositol-4-phosphate 5-kinase
	1	4022075	109	548	19.8905	FGRRES_01220	DNA-directed RNA polymerase II subunit rpb7
	4	1266118	28	142	19.7183	FGRRES_16720	Histone acetyltransferase type b subunit 2
	2	7637248	27	137	19.708	FGRRES_04321	Hypothetical protein
	3	5696495	44	224	19.6429	FGRRES_17517	Copii coated vesicle component sec24
	1	1761614	60	313	19.1693	FGRRES_00553	Hypothetical protein
	2	3111985	50	265	18.8679	FGRRES_16945_M	Palmitoyltransferase pfa5
	1	6645345	91	485	18.7629	FGRRES_02011	Vacuolar protein sorting-associated protein vps5
	1	4804301	19	103	18.4466	FGRRES_01444	Tad3 subunit of tRNA-specific adenosine-34 deaminase
	1	6850695	13	71	18.3099	FGRRES_02082	Lipase class 3
	4	2435300	112	625	17.92	FGRRES_07120	Csx2 protein
	1	937752	17	97	17.5258	FGRRES_00297	Transcriptional regulatory protein Pho23
	4	6667042	11	63	17.4603	FGRRES_17202	Hypothetical protein
	2	6851284	5	29	17.2414	FGRRES_16155	Hypothetical protein
	4	7749815	10	58	17.2414	FGRRES_09034	Cytosolic Fe-S cluster assembly factor NUBP2/Cfd1
	2	8187989	16	94	17.0213	FGRRES_04481	Mannose-6-phosphate isomerase
	4	7814699	51	305	16.7213	FGRRES_09017	ATPase
	3	2876564	159	951	16.7192	FGRRES_05619	Clathrin heavy chain
	1	8759468	84	503	16.6998	FGRRES_02730	Meiotically up-regulated protein 80 protein
	1	6211026	33	198	16.6667	FGRRES_15903	Glycogenin-2 beta
	2	1584208	128	769	16.645	FGRRES_08487_M	Hypothetical protein
	1	3996213	133	830	16.0241	FGRRES_01211	PWWP domain-containing protein 3
	1	1227973	27	171	15.7895	FGRRES_00380	ubiquitin carboxyl-terminal hydrolase 16
	2	6984406	6	38	15.7895	FGRRES_04110	Hypothetical protein
	2	8199701	22	140	15.7143	FGRRES_04487	Glucose transporter-3
	1	1817417	48	306	15.6863	FGRRES_00570	SNF5/SMARCB1/INI1
	1	2438732	61	395	15.443	FGRRES_00741	Histone acetyltransferases subunit 3
	2	1185954	9	59	15.2542	FGRRES_08372	Xeroderma pigmentosum group c complementing factor
	3	940405	154	1041	14.7935	FGRRES_05026	Ulp1 protease family protein
	1	1929428	98	676	14.497	FGRRES_15757	Zinc finger transcription factor ace1
	4	6160652	79	546	14.4689	FGRRES_17235_M	Hypothetical protein
	4	6337262	31	215	14.4186	FGRRES_17266_M	STE20 PAKA protein kinase
	4	7149465	68	484	14.0496	FGRRES_09254	Related to human Ptc protein
	1	6110314	41	292	14.0411	FGRRES_01854	Importin beta-2 subunit
	1	9644374	60	428	14.0187	FGRRES_10041	Meiotically up-regulated protein 89 protein
	1	9104756	7	50	14	FGRRES_09885	Endo alpha-polygalactosaminidase precursor
	4	3514519	58	422	13.7441	FGRRES_07433_M	Rho-GTPase-activating protein 8
	3	4376430	24	175	13.7143	FGRRES_16609	Hypothetical protein
	1	9121373	25	184	13.587	FGRRES_09889	Hypothetical protein
	4	6667717	34	257	13.2296	FGRRES_09406	Transcription initiation factor TFIId subunit 2
	3	3319099	19	145	13.1034	FGRRES_16540	CAMKL protein kinase
	1	2962026	79	605	13.0579	FGRRES_00900	Sphingolipid long chain base-responsive protein lsp1
	2	975622	5	39	12.8205	FGRRES_08307	Hydrolase-the had superfamily protein
	3	5515742	25	198	12.6263	FGRRES_10750	Hypothetical protein
	1	1892801	49	389	12.5964	FGRRES_00592	Hypothetical protein
	1	8274336	119	945	12.5926	FGRRES_02575	RNA-binding protein Sce3
	4	3019950	30	239	12.5523	FGRRES_07284	Alpha-sarcomeric (F-actin cross linking protein)
	3	5193543	34	271	12.5461	FGRRES_06375	Phospholipid:diacylglycerol acyltransferase
	4	1664922	33	268	12.3134	FGRRES_06912_M	Related to ubiquitin C-terminal hydrolase
	4	2344487	44	360	12.2222	FGRRES_07100	U1 snRNP protein
	2	7741150	32	263	12.1673	FGRRES_04349	P element somatic inhibitor
	2	2178778	92	764	12.0419	FGRRES_08659	Hypothetical protein
	1	9988631	155	1292	11.9969	FGRRES_10142	Bzip transcription factor
	1	9125061	32	271	11.8081	FGRRES_09892	Retinoblastoma-binding protein
	2	2080106	39	331	11.7825	FGRRES_17001	AGC YANK protein kinase
	1	8105831	54	474	11.3924	FGRRES_02519	Triacylglycerol lipase
	1	8706390	30	265	11.3208	FGRRES_12183	Sorting nexin mvp-1
	1	9335769	14	128	10.9375	FGRRES_09957	Beta- -n-acetylglucosaminyltransferase
	1	10659122	33	306	10.7843	FGRRES_10360	Zinc C2H2
	1	2809570	45	424	10.6132	FGRRES_00857	Hypothetical protein
	1	4161051	5	48	10.4167	FGRRES_20036	Hypothetical protein
	2	1630288	5	49	10.2041	FGRRES_08501	Hypothetical protein
	1	9163518	34	339	10.0295	FGRRES_09904	Transcription elongation factor spt6
	2	2042433	36	364	9.89011	FGRRES_08619	Transcription initiation factor tfiie subunit beta
	3	1167216	8	81	9.87654	FGRRES_05102	Transcriptional regulatory protein moc3
	4	4959334	46	479	9.60334	FGRRES_13254_M	Importin subunit beta-3
	2	1082716	123	1294	9.50541	FGRRES_08338	Phospho-2-dehydro-3-deoxyheptonate tyrosine-inhibited
	2	7198955	33	351	9.40171	FGRRES_04178	Yvc1-vacuolar cation channel
	1	10303715	28	299	9.36455	FGRRES_10244	M serotype
	4	1584716	58	630	9.20635	FGRRES_13014	Mannan polymerase II complex mnn10 subunit
	3	2127603	16	181	8.83978	FGRRES_16479	SAGA-associated factor 73
	3	862499	99	1122	8.82353	FGRRES_05001_M	Sna2 integral mebrane protein
	1	8796225	13	148	8.78378	FGRRES_02738	Arrestin-related trafficking adapter
	1	4231780	26	301	8.63787	FGRRES_01280	RNA polymeraseII mediator complex protein pmc1
	3	5627899	16	190	8.42105	FGRRES_10781	Hypothetical protein
	1	2452419	40	503	7.95229	FGRRES_00746	Ubiquitin-like protein dsk2
	3	1711221	17	214	7.94393	FGRRES_05273	Rho guanyl nucleotide exchange factor
	1	10487589	44	568	7.74648	FGRRES_10304	H ACA ribonucleoprotein complex subunit 2
	2	2433433	7	91	7.69231	FGRRES_08728	Mac1p interacting protein
	1	2688180	15	197	7.61421	FGRRES_00822	Actin like protein 2/3 subunit 5
	1	6186065	14	188	7.44681	FGRRES_01875	Nicotinamide n-methyltransferase
	2	7156536	17	233	7.29614	FGRRES_04168	Component of non-clathrin vesicle coat
	4	1154919	34	466	7.29614	FGRRES_06767	UV excision repair protein rad23
	3	2522454	6	84	7.14286	FGRRES_05515	Hypothetical protein
	3	5276545	10	140	7.14286	FGRRES_06404_M	Acyl-protein thioesterase 1
	2	2250909	142	1989	7.13927	FGRRES_08682	Hypothetical protein
	1	9357178	18	259	6.94981	FGRRES_09965	Nuclear pore protein
	4	1332662	6	88	6.81818	FGRRES_06814	Replication fork protection complex subunit Tof1/Swi1
	4	3400475	15	220	6.81818	FGRRES_07395	Protein phosphatase 5
	2	1379550	9	137	6.56934	FGRRES_08431	Copper-activated transcription factor
	3	1805260	8	122	6.55738	FGRRES_05306	Vps15 protein kinase
	1	2303524	24	370	6.48649	FGRRES_00703	Hypothetical protein
	1	8523009	17	265	6.41509	FGRRES_02646	Cellular nucleic acid-binding protein
	3	2009058	17	265	6.41509	FGRRES_05358_M	F-box domain-containing protein
	4	829579	5	80	6.25	FGRRES_16700_M	Hypothetical protein
	2	6834348	56	922	6.07375	FGRRES_04070	Hypothetical protein
	3	2189477	12	205	5.85366	FGRRES_05414	Solute carrier family member 46
	3	5835593	9	155	5.80645	FGRRES_10835	Hypothetical protein
	2	2352322	10	176	5.68182	FGRRES_16987	Regulatory associated protein-mtor
	1	9129822	7	132	5.30303	FGRRES_09893	Cytosolic nonspecific dipeptidase
	1	6447818	6	114	5.26316	FGRRES_01954	Vps52/Sac2 family protein
	3	2949817	15	289	5.19031	FGRRES_05642_M	SH3 domain-containing protein
	3	5675687	22	453	4.85651	FGRRES_10796	cAMP-independent regulatory protein pac2
	1	9525943	18	381	4.72441	FGRRES_10007	Phosphatidylserine decarboxylase
	3	2265805	48	1090	4.40367	FGRRES_05433	40s ribosomal protein S3
	3	6167397	46	1045	4.40191	FGRRES_10940	Sik1-involved in pre-RNA processing
	1	2548809	18	417	4.31655	FGRRES_00787	Allantoate permease
	4	284463	6	143	4.1958	FGRRES_06507	AMP-binding enzyme
	1	8152282	13	313	4.15335	FGRRES_02532	Cop9 signalosome complex subunit 1
	3	2254957	13	317	4.10095	FGRRES_05430	Protein phosphatase 2 (formerly 2a) regulatory subunit a
	3	4828841	5	127	3.93701	FGRRES_06263	Integral membrane protein
	1	1190127	10	260	3.84615	FGRRES_00367	Proteasome component pup1
	3	4046296	7	189	3.7037	FGRRES_06016	Dedicator of cytokinesis protein 1
	4	5741997	17	479	3.54906	FGRRES_09672	Stip1 likey and u-box containing protein 1
	1	10240370	5	143	3.4965	FGRRES_10226	Ubiquitin-like modifier-activating enzyme atg-7
	4	1739356	10	305	3.27869	FGRRES_06935	Cell cycle control protein Cwf14
	1	6529882	15	459	3.26797	FGRRES_01975	Arylacetamide deacetylase
