# Supplementary material for: Genome-wide A-to-I RNA editing in fungi independent of ADAR enzymes
Source: Genome Res. 2016 Apr;26(4):499–509. doi: 10.1101/gr.199877.115 (PMC4817773; doi:10.1101/gr.199877.115)
Supplement: Supplemental Material [file supp_gr.199877.115_Supplemental_Table_4.xlsx]

## Sheet: Sheet1
	Supplemental Table 4. F. graminearum genes with PUK1-like editing events (stop codons edited to regular amino acid codons)
	Chr	Site	Count	Coverage	Editing level	Gene ID	Blastp annotation	Upregulated in perithecia	Ortholog in F. verticillioides	Ortholog in N. crassa
	3	2656456	245	285	85.9649	FGRRES_16497	CAMK protein kinase	Y	FVEG_15965#	NCU06486
	1	6881574	38	69	55.0725	FGRRES_02091	Dcp1-like mRNA-decapping enzyme	N	FVEG_07552#	NCU16972
	2	2147404	25	40	62.5	FGRRES_08648	RIP defective (rid-1)	Y	FVEG_02018#	NCU02034
	4	7027453	4312	4390	98.2232	FGRRES_13546	Extracellular metalloproteinase	Y	FVEG_03819#	NCU05756
	3	5461017	829	1200	69.0833	FGRRES_10728	AMA1, activator of meiotic anaphase promoting complex (APC/C)	Y	FVEG_11389#	NCU01572
	1	5502412	23	28	82.1429	FGRRES_01649*	Rho GTPase	Y	FVEG_09747#
	3	1964405	505	570	88.5965	FGRRES_05345	Ktr1-mannosyltransferase	Y	FVEG_04266#
	1	9826713	1213	1243	97.5865	FGRRES_10094*	Major facilitator superfamily (MFS) transporter	Y	FVEG_15134#	NCU01009#
	4	7862921	139	197	70.5584	FGRRES_08999	Rho-GTPase-activating protein 6	Y	FVEG_06666#	NCU01472
	2	2627662	143	262	54.5802	FGRRES_08782_M	Hypothetical protein	Y	FVEG_01897#
	1	2930779	9	13	69.2308	FGRRES_00889	Hypothetical protein	Y	FVEG_14713#
	1	1988524	458	501	91.4172	FGRRES_00619	Hypothetical protein	Y	FVEG_01085#
	4	2379252	175	187	93.5829	FGRRES_07111	Hypothetical protein	Y	FVEG_16240#	NCU07508
	4	2285888	282	326	86.5031	FGRRES_07081	Hypothetical protein	Y	FVEG_08092#	NCU09224
	2	1233905	983	989	99.3933	FGRRES_08389*	Hypothetical protein	Y	FVEG_02307#
	3	2215660	252	283	89.0459	FGRRES_12736	Hypothetical protein	Y	FVEG_16018#
	2	1853239	84	105	80	FGRRES_17012	Hypothetical protein	N	FVEG_02250#	NCU02594
	3	1581424	543	568	95.5986	FGRRES_05228	Hypothetical protein	Y	FVEG_15820#	NCU16789
	1	6632069	53	82	64.6341	FGRRES_15920	Hypothetical protein	Y	FVEG_07462#
	2	1586146	8	10	80	FGRRES_17026	Hypothetical protein	Y	FVEG_14989#	NCU04083
	4	7312750	37	53	69.8113	FGRRES_09199	Hypothetical protein	Y	FVEG_15324#
	1	10507257	41	61	67.2131	FGRRES_10314	Hypothetical protein	N	FVEG_03048#
	3	808427	275	319	86.2069	FGRRES_16447	Hypothetical protein	Y	FVEG_06756#
	1	8841176	413	772	53.4974	FGRRES_02749_M	Vacuolar membrane protein Hmt1	Y	FVEG_16485#	NCU03228
	3	5748370	20	80	25	FGRRES_17513	Hypothetical protein	Y	FVEG_11485#
	3	2691951	18	42	42.8571	FGRRES_16500	Hypothetical protein	N	FVEG_15961#	NCU09007#
	3	936687	26	89	29.2135	FGRRES_16449	Hypothetical protein	Y	FVEG_15784#
	1	3038488	11	107	10.2804	FGRRES_15798	Hypothetical protein	Y	FVEG_00690#
	4	7785926	16	41	39.0244	FGRRES_13500_1_M	Hypothetical protein	Y	FVEG_06694#
	4	6982898	84	401	20.9476	FGRRES_09306	SIN3, component of both the Rpd3S and Rpd3L histone deacetylase complexes	N	FVEG_03793#	NCU02578
	3	4697994	171	450	38	FGRRES_06217	Putative aryl-alcohol dehydrogenase	Y	FVEG_06183#	NCU07723
	3	2613005	74	154	48.0519	FGRRES_05536	Hypothetical protein	Y	FVEG_06961#	NCU16676
	2	7637427	68	187	36.3636	FGRRES_04321	Hypothetical protein	N	FVEG_11342#	NCU05460
	1	5161493	29	71	40.8451	FGRRES_01563	SPO22, Meiosis-specific protein essential for chromosome synapsis	Y	FVEG_16625#	NCU03351
	1	3821870	119	140	85	FGRRES_01165_M	DNA mismatch repair protein Pms2	Y		NCU09373
	2	2832791	40	71	56.338	FGRRES_08833	F-box domain containing protein	N
	3	3253453	296	320	92.5	FGRRES_05742	Geranylgeranyl pyrophosphate synthetase	Y
	2	6782537	633	785	80.6369	FGRRES_16163	Alpha beta hydrolase superfamily	Y
	1	503904	223	274	81.3869	FGRRES_00151	Hypothetical protein	Y
	1	8826854	90	97	92.7835	FGRRES_02745	Hypothetical protein	Y
	3	3380906	55	89	61.7978	FGRRES_05785	Hypothetical protein	Y
	1	4840713	474	506	93.6759	FGRRES_11957	Hypothetical protein	Y
	1	1629997	101	125	80.8	FGRRES_00521	Hypothetical protein	N
	1	3233295	29	39	74.359	FGRRES_11870	Hypothetical protein	N
	3	400346	239	240	99.5833	FGRRES_12623_M*	Hypothetical protein	Y
	2	10627	79	138	57.2464	FGRRES_14031_M*	Hypothetical protein	N	FVEG_03515
	3	3324963	3147	3832	82.1242	FGRRES_16541	Hypothetical protein	Y	FVEG_05809
	3	5785624	199	214	92.9907	FGRRES_10824	Hypothetical protein	Y	FVEG_17038	NCU03403
	3	2746213	67	109	61.4679	FGRRES_05577	Hypothetical protein	Y	FVEG_06914
	1	6129629	405	418	96.89	FGRRES_01859	Hypothetical protein	Y	FVEG_07396
	3	6684767	23	29	79.3103	FGRRES_17470	Hypothetical protein	Y	FVEG_12205
	1	6629220	25	27	92.5926	FGRRES_12057	Hypothetical protein	Y
	1	8309719	10	18	55.5556	FGRRES_02582	Hypothetical protein	N
	4	6724822	13	19	68.4211	FGRRES_17198	Hypothetical protein	Y	FVEG_03935	NCU17227
	3	7236985	816	842	96.9121	FGRRES_11312_M	Hypothetical protein	Y
	4	5333889	31	81	38.2716	FGRRES_17272	Hypothetical protein	Y
	4	7961829	7	35	20	FGRRES_17135	Hypothetical protein	Y
	3	2743340	146	1238	11.7932	FGRRES_16502_M	Hypothetical protein	Y	FVEG_15959	NCU00370
	1	9369976	5	12	41.6667	FGRRES_15567	Hypothetical protein	N
	1	561446	36	95	37.8947	FGRRES_11696_M	NFX1-type zinc finger-containing protein 1	Y	FVEG_00185	NCU05861
	1	11035315	28	321	8.72274	FGRRES_10489	Hypothetical protein	Y
	1	10759831	97	237	40.9283	FGRRES_10393	Hypothetical protein	Y
	4	4328037	10	24	41.6667	FGRRES_07731_M	Hypothetical protein	Y
	4	584965	32	111	28.8288	FGRRES_06610	Alkaline phosphatase	Y	FVEG_05513	NCU09631
	3	3465393	12	144	8.33333	FGRRES_05816	Major facilitator superfamily MFS-1	Y
	2	6622499	7	32	21.875	FGRRES_03996	Related to rabkinesin-6	N	FVEG_16734	NCU05180
	1	6504778	173	574	30.1394	FGRRES_01968	LHP1, RNA binding protein required for maturation of tRNA and U6 snRNA	N	FVEG_07274	NCU08295
	1	5146476	205	340	60.2941	FGRRES_01559	Serine threonine protein kinase	Y	FVEG_09640
	1	1146153	27	102	26.4706	FGRRES_00354	Hypothetical protein	N
	* F. graminearum genes selected for further functional characerization in this study.
	# Orthologs in F. verticillioides or N. crassa with PUK1-like editing events.
